# Supplementary material for: Comprehensive repeatome annotation reveals strong potential impact of repetitive elements on tomato ripening
Source: BMC Genomics. 2016 Aug 12;17:624. doi: 10.1186/s12864-016-2980-z (PMC4981986; doi:10.1186/s12864-016-2980-z)
Supplement: Additional file 2 — Table S1. Genome coverage of the different repeat families. For each repeat family, a coverage calculation has been performed and the percentage of coverage of each family was calculated.by relating the cover of every family with respect to the overall repeat coverage of the genome. Table S2. Compartmentalization of the tomato genome in three major regions. Coordinates in gff3 format of the three regions of the genome based on the repeats and genes coverage calculation into 500 kb windows with overlap of 50 kb.Table S3. Names of identified TE-genes. List of ID and name of each gene identified as a TE-gene. Table S4. Statistical results of the analysis of transposable elements consensus by the method of Makarevitch and al. Table S5. Functional annotation of differentially expressed genes candidate as RIN targets. (XLSX 89 kb) [file 12864_2016_2980_MOESM2_ESM.xlsx]

## Sheet: SUPTABLE1
Table S1 Genome coverage of the different repeat families. For each repeat family, a coverage calculation has been performed and the percentage of coverage of each family was calculated.by relating the cover of every family with respect to the overall repeat coverage of the genome.
TE family	Genome coverage (base)	Percentage of coverage (Family coverage / All TE coverage * 100)
Confused	61800190	11.977
Copia	71599900	13.876
DNA	17843139	3.458
Non autonomous DNA	20131459	3.901
Gypsy	234066373	45.362
Helitron	886013	0.172
Host Gene	4188038	0.812
Line	21519173	4.17
Other Retrotransposon	1656872	0.321
SSR	26488026	5.133
Unclassified	51620629	10.004
Virus	4199202	0.814
All	51599904

## Sheet: SUPTABLE2
Table S2 Compartmentalization of the tomato genome in three major regions. Coordinates in gff3 format of the three regions of the genome based on the repeats and genes coverage calculation into 500kb windows with overlap of 50kb .
S_lycopersicum_SL2_40ch01	Circos	BAND	1	3200000	.	+	.	ID=Repeat_Poor_SL2.40ch01_1_3200000
S_lycopersicum_SL2_40ch01	Circos	BAND	3200001	5900000	.	+	.	ID=Intermediate_SL2.40ch01_3200001_5900000
S_lycopersicum_SL2_40ch01	Circos	BAND	5900001	62150000	.	+	.	ID=Repeat_Rich_SL2.40ch01_5900001_62150000
S_lycopersicum_SL2_40ch01	Circos	BAND	62150001	62600000	.	+	.	ID=Intermediate_SL2.40ch01_62150001_62600000
S_lycopersicum_SL2_40ch01	Circos	BAND	62600001	63950000	.	+	.	ID=Repeat_Rich_SL2.40ch01_62600001_63950000
S_lycopersicum_SL2_40ch01	Circos	BAND	63950001	64850000	.	+	.	ID=Intermediate_SL2.40ch01_63950001_64850000
S_lycopersicum_SL2_40ch01	Circos	BAND	64850001	66650000	.	+	.	ID=Repeat_Rich_SL2.40ch01_64850001_66650000
S_lycopersicum_SL2_40ch01	Circos	BAND	66650001	69800000	.	+	.	ID=Intermediate_SL2.40ch01_66650001_69800000
S_lycopersicum_SL2_40ch01	Circos	BAND	69800001	90050000	.	+	.	ID=Repeat_Poor_SL2.40ch01_69800001_90050000
S_lycopersicum_SL2_40ch01	Circos	BAND	90050001	90304244	.	+	.	ID=Intermediate_SL2.40ch01_90050001_90304244
S_lycopersicum_SL2_40ch02	Circos	BAND	1	6350000	.	+	.	ID=Repeat_Rich_SL2.40ch02_1_6350000
S_lycopersicum_SL2_40ch02	Circos	BAND	6350001	6800000	.	+	.	ID=Intermediate_SL2.40ch02_6350001_6800000
S_lycopersicum_SL2_40ch02	Circos	BAND	6800001	13100000	.	+	.	ID=Repeat_Rich_SL2.40ch02_6800001_13100000
S_lycopersicum_SL2_40ch02	Circos	BAND	13100001	13550000	.	+	.	ID=Intermediate_SL2.40ch02_13100001_13550000
S_lycopersicum_SL2_40ch02	Circos	BAND	13550001	14000000	.	+	.	ID=Repeat_Rich_SL2.40ch02_13550001_14000000
S_lycopersicum_SL2_40ch02	Circos	BAND	14000001	14450000	.	+	.	ID=Intermediate_SL2.40ch02_14000001_14450000
S_lycopersicum_SL2_40ch02	Circos	BAND	14450001	14900000	.	+	.	ID=Repeat_Rich_SL2.40ch02_14450001_14900000
S_lycopersicum_SL2_40ch02	Circos	BAND	14900001	16250000	.	+	.	ID=Intermediate_SL2.40ch02_14900001_16250000
S_lycopersicum_SL2_40ch02	Circos	BAND	16250001	17600000	.	+	.	ID=Repeat_Rich_SL2.40ch02_16250001_17600000
S_lycopersicum_SL2_40ch02	Circos	BAND	17600001	18050000	.	+	.	ID=Intermediate_SL2.40ch02_17600001_18050000
S_lycopersicum_SL2_40ch02	Circos	BAND	18050001	18500000	.	+	.	ID=Repeat_Rich_SL2.40ch02_18050001_18500000
S_lycopersicum_SL2_40ch02	Circos	BAND	18500001	19400000	.	+	.	ID=Intermediate_SL2.40ch02_18500001_19400000
S_lycopersicum_SL2_40ch02	Circos	BAND	19400001	19850000	.	+	.	ID=Repeat_Rich_SL2.40ch02_19400001_19850000
S_lycopersicum_SL2_40ch02	Circos	BAND	19850001	20300000	.	+	.	ID=Intermediate_SL2.40ch02_19850001_20300000
S_lycopersicum_SL2_40ch02	Circos	BAND	20300001	21200000	.	+	.	ID=Repeat_Rich_SL2.40ch02_20300001_21200000
S_lycopersicum_SL2_40ch02	Circos	BAND	21200001	22100000	.	+	.	ID=Intermediate_SL2.40ch02_21200001_22100000
S_lycopersicum_SL2_40ch02	Circos	BAND	22100001	27500000	.	+	.	ID=Repeat_Rich_SL2.40ch02_22100001_27500000
S_lycopersicum_SL2_40ch02	Circos	BAND	27500001	31100000	.	+	.	ID=Intermediate_SL2.40ch02_27500001_31100000
S_lycopersicum_SL2_40ch02	Circos	BAND	31100001	31550000	.	+	.	ID=Repeat_Poor_SL2.40ch02_31100001_31550000
S_lycopersicum_SL2_40ch02	Circos	BAND	31550001	32000000	.	+	.	ID=Intermediate_SL2.40ch02_31550001_32000000
S_lycopersicum_SL2_40ch02	Circos	BAND	32000001	49550000	.	+	.	ID=Repeat_Poor_SL2.40ch02_32000001_49550000
S_lycopersicum_SL2_40ch02	Circos	BAND	49550001	49918294	.	+	.	ID=Intermediate_SL2.40ch02_49550001_49918294
S_lycopersicum_SL2_40ch03	Circos	BAND	1	2300000	.	+	.	ID=Repeat_Poor_SL2.40ch03_1_2300000
S_lycopersicum_SL2_40ch03	Circos	BAND	2300001	2750000	.	+	.	ID=Intermediate_SL2.40ch03_2300001_2750000
S_lycopersicum_SL2_40ch03	Circos	BAND	2750001	6350000	.	+	.	ID=Repeat_Rich_SL2.40ch03_2750001_6350000
S_lycopersicum_SL2_40ch03	Circos	BAND	6350001	6800000	.	+	.	ID=Intermediate_SL2.40ch03_6350001_6800000
S_lycopersicum_SL2_40ch03	Circos	BAND	6800001	9050000	.	+	.	ID=Repeat_Poor_SL2.40ch03_6800001_9050000
S_lycopersicum_SL2_40ch03	Circos	BAND	9050001	12650000	.	+	.	ID=Intermediate_SL2.40ch03_9050001_12650000
S_lycopersicum_SL2_40ch03	Circos	BAND	12650001	15350000	.	+	.	ID=Repeat_Rich_SL2.40ch03_12650001_15350000
S_lycopersicum_SL2_40ch03	Circos	BAND	15350001	15800000	.	+	.	ID=Intermediate_SL2.40ch03_15350001_15800000
S_lycopersicum_SL2_40ch03	Circos	BAND	15800001	41000000	.	+	.	ID=Repeat_Rich_SL2.40ch03_15800001_41000000
S_lycopersicum_SL2_40ch03	Circos	BAND	41000001	41900000	.	+	.	ID=Intermediate_SL2.40ch03_41000001_41900000
S_lycopersicum_SL2_40ch03	Circos	BAND	41900001	43700000	.	+	.	ID=Repeat_Rich_SL2.40ch03_41900001_43700000
S_lycopersicum_SL2_40ch03	Circos	BAND	43700001	44600000	.	+	.	ID=Intermediate_SL2.40ch03_43700001_44600000
S_lycopersicum_SL2_40ch03	Circos	BAND	44600001	45050000	.	+	.	ID=Repeat_Rich_SL2.40ch03_44600001_45050000
S_lycopersicum_SL2_40ch03	Circos	BAND	45050001	45500000	.	+	.	ID=Intermediate_SL2.40ch03_45050001_45500000
S_lycopersicum_SL2_40ch03	Circos	BAND	45500001	46850000	.	+	.	ID=Repeat_Poor_SL2.40ch03_45500001_46850000
S_lycopersicum_SL2_40ch03	Circos	BAND	46850001	50450000	.	+	.	ID=Intermediate_SL2.40ch03_46850001_50450000
S_lycopersicum_SL2_40ch03	Circos	BAND	50450001	50900000	.	+	.	ID=Repeat_Rich_SL2.40ch03_50450001_50900000
S_lycopersicum_SL2_40ch03	Circos	BAND	50900001	51350000	.	+	.	ID=Intermediate_SL2.40ch03_50900001_51350000
S_lycopersicum_SL2_40ch03	Circos	BAND	51350001	51800000	.	+	.	ID=Repeat_Rich_SL2.40ch03_51350001_51800000
S_lycopersicum_SL2_40ch03	Circos	BAND	51800001	52700000	.	+	.	ID=Intermediate_SL2.40ch03_51800001_52700000
S_lycopersicum_SL2_40ch03	Circos	BAND	52700001	54500000	.	+	.	ID=Repeat_Poor_SL2.40ch03_52700001_54500000
S_lycopersicum_SL2_40ch03	Circos	BAND	54500001	55400000	.	+	.	ID=Repeat_Rich_SL2.40ch03_54500001_55400000
S_lycopersicum_SL2_40ch03	Circos	BAND	55400001	55850000	.	+	.	ID=Intermediate_SL2.40ch03_55400001_55850000
S_lycopersicum_SL2_40ch03	Circos	BAND	55850001	64840714	.	+	.	ID=Repeat_Poor_SL2.40ch03_55850001_64840714
S_lycopersicum_SL2_40ch04	Circos	BAND	1	3650000	.	+	.	ID=Repeat_Poor_SL2.40ch04_1_3650000
S_lycopersicum_SL2_40ch04	Circos	BAND	3650001	4100000	.	+	.	ID=Intermediate_SL2.40ch04_3650001_4100000
S_lycopersicum_SL2_40ch04	Circos	BAND	4100001	5900000	.	+	.	ID=Repeat_Poor_SL2.40ch04_4100001_5900000
S_lycopersicum_SL2_40ch04	Circos	BAND	5900001	7700000	.	+	.	ID=Intermediate_SL2.40ch04_5900001_7700000
S_lycopersicum_SL2_40ch04	Circos	BAND	7700001	30650000	.	+	.	ID=Repeat_Rich_SL2.40ch04_7700001_30650000
S_lycopersicum_SL2_40ch04	Circos	BAND	30650001	31100000	.	+	.	ID=Intermediate_SL2.40ch04_30650001_31100000
S_lycopersicum_SL2_40ch04	Circos	BAND	31100001	38750000	.	+	.	ID=Repeat_Rich_SL2.40ch04_31100001_38750000
S_lycopersicum_SL2_40ch04	Circos	BAND	38750001	39200000	.	+	.	ID=Intermediate_SL2.40ch04_38750001_39200000
S_lycopersicum_SL2_40ch04	Circos	BAND	39200001	46400000	.	+	.	ID=Repeat_Rich_SL2.40ch04_39200001_46400000
S_lycopersicum_SL2_40ch04	Circos	BAND	46400001	46850000	.	+	.	ID=Intermediate_SL2.40ch04_46400001_46850000
S_lycopersicum_SL2_40ch04	Circos	BAND	46850001	49550000	.	+	.	ID=Repeat_Rich_SL2.40ch04_46850001_49550000
S_lycopersicum_SL2_40ch04	Circos	BAND	49550001	50450000	.	+	.	ID=Intermediate_SL2.40ch04_49550001_50450000
S_lycopersicum_SL2_40ch04	Circos	BAND	50450001	50900000	.	+	.	ID=Repeat_Rich_SL2.40ch04_50450001_50900000
S_lycopersicum_SL2_40ch04	Circos	BAND	50900001	54050000	.	+	.	ID=Intermediate_SL2.40ch04_50900001_54050000
S_lycopersicum_SL2_40ch04	Circos	BAND	54050001	54950000	.	+	.	ID=Repeat_Poor_SL2.40ch04_54050001_54950000
S_lycopersicum_SL2_40ch04	Circos	BAND	54950001	55850000	.	+	.	ID=Intermediate_SL2.40ch04_54950001_55850000
S_lycopersicum_SL2_40ch04	Circos	BAND	55850001	56300000	.	+	.	ID=Repeat_Poor_SL2.40ch04_55850001_56300000
S_lycopersicum_SL2_40ch04	Circos	BAND	56300001	56750000	.	+	.	ID=Intermediate_SL2.40ch04_56300001_56750000
S_lycopersicum_SL2_40ch04	Circos	BAND	56750001	64064312	.	+	.	ID=Repeat_Poor_SL2.40ch04_56750001_64064312
S_lycopersicum_SL2_40ch05	Circos	BAND	1	4550000	.	+	.	ID=Repeat_Poor_SL2.40ch05_1_4550000
S_lycopersicum_SL2_40ch05	Circos	BAND	4550001	5000000	.	+	.	ID=Intermediate_SL2.40ch05_4550001_5000000
S_lycopersicum_SL2_40ch05	Circos	BAND	5000001	6350000	.	+	.	ID=Repeat_Poor_SL2.40ch05_5000001_6350000
S_lycopersicum_SL2_40ch05	Circos	BAND	6350001	9050000	.	+	.	ID=Intermediate_SL2.40ch05_6350001_9050000
S_lycopersicum_SL2_40ch05	Circos	BAND	9050001	9950000	.	+	.	ID=Repeat_Rich_SL2.40ch05_9050001_9950000
S_lycopersicum_SL2_40ch05	Circos	BAND	9950001	10850000	.	+	.	ID=Intermediate_SL2.40ch05_9950001_10850000
S_lycopersicum_SL2_40ch05	Circos	BAND	10850001	28850000	.	+	.	ID=Repeat_Rich_SL2.40ch05_10850001_28850000
S_lycopersicum_SL2_40ch05	Circos	BAND	28850001	29300000	.	+	.	ID=Intermediate_SL2.40ch05_28850001_29300000
S_lycopersicum_SL2_40ch05	Circos	BAND	29300001	56300000	.	+	.	ID=Repeat_Rich_SL2.40ch05_29300001_56300000
S_lycopersicum_SL2_40ch05	Circos	BAND	56300001	56750000	.	+	.	ID=Intermediate_SL2.40ch05_56300001_56750000
S_lycopersicum_SL2_40ch05	Circos	BAND	56750001	57200000	.	+	.	ID=Repeat_Rich_SL2.40ch05_56750001_57200000
S_lycopersicum_SL2_40ch05	Circos	BAND	57200001	60800000	.	+	.	ID=Intermediate_SL2.40ch05_57200001_60800000
S_lycopersicum_SL2_40ch05	Circos	BAND	60800001	65021438	.	+	.	ID=Repeat_Poor_SL2.40ch05_60800001_65021438
S_lycopersicum_SL2_40ch06	Circos	BAND	1	500000	.	+	.	ID=Intermediate_SL2.40ch06_1_500000
S_lycopersicum_SL2_40ch06	Circos	BAND	500001	1400000	.	+	.	ID=Repeat_Poor_SL2.40ch06_500001_1400000
S_lycopersicum_SL2_40ch06	Circos	BAND	1400001	1850000	.	+	.	ID=Intermediate_SL2.40ch06_1400001_1850000
S_lycopersicum_SL2_40ch06	Circos	BAND	1850001	3200000	.	+	.	ID=Repeat_Poor_SL2.40ch06_1850001_3200000
S_lycopersicum_SL2_40ch06	Circos	BAND	3200001	4100000	.	+	.	ID=Intermediate_SL2.40ch06_3200001_4100000
S_lycopersicum_SL2_40ch06	Circos	BAND	4100001	14900000	.	+	.	ID=Repeat_Rich_SL2.40ch06_4100001_14900000
S_lycopersicum_SL2_40ch06	Circos	BAND	14900001	15350000	.	+	.	ID=Intermediate_SL2.40ch06_14900001_15350000
S_lycopersicum_SL2_40ch06	Circos	BAND	15350001	19850000	.	+	.	ID=Repeat_Rich_SL2.40ch06_15350001_19850000
S_lycopersicum_SL2_40ch06	Circos	BAND	19850001	23000000	.	+	.	ID=Intermediate_SL2.40ch06_19850001_23000000
S_lycopersicum_SL2_40ch06	Circos	BAND	23000001	27500000	.	+	.	ID=Repeat_Rich_SL2.40ch06_23000001_27500000
S_lycopersicum_SL2_40ch06	Circos	BAND	27500001	33350000	.	+	.	ID=Intermediate_SL2.40ch06_27500001_33350000
S_lycopersicum_SL2_40ch06	Circos	BAND	33350001	33800000	.	+	.	ID=Repeat_Poor_SL2.40ch06_33350001_33800000
S_lycopersicum_SL2_40ch06	Circos	BAND	33800001	34250000	.	+	.	ID=Intermediate_SL2.40ch06_33800001_34250000
S_lycopersicum_SL2_40ch06	Circos	BAND	34250001	45950000	.	+	.	ID=Repeat_Poor_SL2.40ch06_34250001_45950000
S_lycopersicum_SL2_40ch06	Circos	BAND	45950001	46041636	.	+	.	ID=Intermediate_SL2.40ch06_45950001_46041636
S_lycopersicum_SL2_40ch07	Circos	BAND	1	3650000	.	+	.	ID=Repeat_Poor_SL2.40ch07_1_3650000
S_lycopersicum_SL2_40ch07	Circos	BAND	3650001	5450000	.	+	.	ID=Intermediate_SL2.40ch07_3650001_5450000
S_lycopersicum_SL2_40ch07	Circos	BAND	5450001	6350000	.	+	.	ID=Repeat_Rich_SL2.40ch07_5450001_6350000
S_lycopersicum_SL2_40ch07	Circos	BAND	6350001	6800000	.	+	.	ID=Intermediate_SL2.40ch07_6350001_6800000
S_lycopersicum_SL2_40ch07	Circos	BAND	6800001	7250000	.	+	.	ID=Repeat_Rich_SL2.40ch07_6800001_7250000
S_lycopersicum_SL2_40ch07	Circos	BAND	7250001	9050000	.	+	.	ID=Intermediate_SL2.40ch07_7250001_9050000
S_lycopersicum_SL2_40ch07	Circos	BAND	9050001	49100000	.	+	.	ID=Repeat_Rich_SL2.40ch07_9050001_49100000
S_lycopersicum_SL2_40ch07	Circos	BAND	49100001	49550000	.	+	.	ID=Intermediate_SL2.40ch07_49100001_49550000
S_lycopersicum_SL2_40ch07	Circos	BAND	49550001	51350000	.	+	.	ID=Repeat_Rich_SL2.40ch07_49550001_51350000
S_lycopersicum_SL2_40ch07	Circos	BAND	51350001	55400000	.	+	.	ID=Intermediate_SL2.40ch07_51350001_55400000
S_lycopersicum_SL2_40ch07	Circos	BAND	55400001	55850000	.	+	.	ID=Repeat_Poor_SL2.40ch07_55400001_55850000
S_lycopersicum_SL2_40ch07	Circos	BAND	55850001	56300000	.	+	.	ID=Intermediate_SL2.40ch07_55850001_56300000
S_lycopersicum_SL2_40ch07	Circos	BAND	56300001	56750000	.	+	.	ID=Repeat_Poor_SL2.40ch07_56300001_56750000
S_lycopersicum_SL2_40ch07	Circos	BAND	56750001	58100000	.	+	.	ID=Intermediate_SL2.40ch07_56750001_58100000
S_lycopersicum_SL2_40ch07	Circos	BAND	58100001	65268621	.	+	.	ID=Repeat_Poor_SL2.40ch07_58100001_65268621
S_lycopersicum_SL2_40ch08	Circos	BAND	1	3200000	.	+	.	ID=Repeat_Poor_SL2.40ch08_1_3200000
S_lycopersicum_SL2_40ch08	Circos	BAND	3200001	5000000	.	+	.	ID=Intermediate_SL2.40ch08_3200001_5000000
S_lycopersicum_SL2_40ch08	Circos	BAND	5000001	45950000	.	+	.	ID=Repeat_Rich_SL2.40ch08_5000001_45950000
S_lycopersicum_SL2_40ch08	Circos	BAND	45950001	46850000	.	+	.	ID=Intermediate_SL2.40ch08_45950001_46850000
S_lycopersicum_SL2_40ch08	Circos	BAND	46850001	48650000	.	+	.	ID=Repeat_Rich_SL2.40ch08_46850001_48650000
S_lycopersicum_SL2_40ch08	Circos	BAND	48650001	49100000	.	+	.	ID=Intermediate_SL2.40ch08_48650001_49100000
S_lycopersicum_SL2_40ch08	Circos	BAND	49100001	49550000	.	+	.	ID=Repeat_Rich_SL2.40ch08_49100001_49550000
S_lycopersicum_SL2_40ch08	Circos	BAND	49550001	54050000	.	+	.	ID=Intermediate_SL2.40ch08_49550001_54050000
S_lycopersicum_SL2_40ch08	Circos	BAND	54050001	63032657	.	+	.	ID=Repeat_Poor_SL2.40ch08_54050001_63032657
S_lycopersicum_SL2_40ch09	Circos	BAND	1	4550000	.	+	.	ID=Repeat_Poor_SL2.40ch09_1_4550000
S_lycopersicum_SL2_40ch09	Circos	BAND	4550001	6350000	.	+	.	ID=Intermediate_SL2.40ch09_4550001_6350000
S_lycopersicum_SL2_40ch09	Circos	BAND	6350001	6800000	.	+	.	ID=Repeat_Rich_SL2.40ch09_6350001_6800000
S_lycopersicum_SL2_40ch09	Circos	BAND	6800001	7250000	.	+	.	ID=Intermediate_SL2.40ch09_6800001_7250000
S_lycopersicum_SL2_40ch09	Circos	BAND	7250001	18950000	.	+	.	ID=Repeat_Rich_SL2.40ch09_7250001_18950000
S_lycopersicum_SL2_40ch09	Circos	BAND	18950001	19400000	.	+	.	ID=Intermediate_SL2.40ch09_18950001_19400000
S_lycopersicum_SL2_40ch09	Circos	BAND	19400001	50000000	.	+	.	ID=Repeat_Rich_SL2.40ch09_19400001_50000000
S_lycopersicum_SL2_40ch09	Circos	BAND	50000001	50450000	.	+	.	ID=Intermediate_SL2.40ch09_50000001_50450000
S_lycopersicum_SL2_40ch09	Circos	BAND	50450001	55850000	.	+	.	ID=Repeat_Rich_SL2.40ch09_50450001_55850000
S_lycopersicum_SL2_40ch09	Circos	BAND	55850001	59450000	.	+	.	ID=Intermediate_SL2.40ch09_55850001_59450000
S_lycopersicum_SL2_40ch09	Circos	BAND	59450001	59900000	.	+	.	ID=Repeat_Poor_SL2.40ch09_59450001_59900000
S_lycopersicum_SL2_40ch09	Circos	BAND	59900001	60350000	.	+	.	ID=Intermediate_SL2.40ch09_59900001_60350000
S_lycopersicum_SL2_40ch09	Circos	BAND	60350001	61250000	.	+	.	ID=Repeat_Poor_SL2.40ch09_60350001_61250000
S_lycopersicum_SL2_40ch09	Circos	BAND	61250001	61700000	.	+	.	ID=Intermediate_SL2.40ch09_61250001_61700000
S_lycopersicum_SL2_40ch09	Circos	BAND	61700001	67662091	.	+	.	ID=Repeat_Poor_SL2.40ch09_61700001_67662091
S_lycopersicum_SL2_40ch10	Circos	BAND	1	3200000	.	+	.	ID=Repeat_Poor_SL2.40ch10_1_3200000
S_lycopersicum_SL2_40ch10	Circos	BAND	3200001	4550000	.	+	.	ID=Intermediate_SL2.40ch10_3200001_4550000
S_lycopersicum_SL2_40ch10	Circos	BAND	4550001	41450000	.	+	.	ID=Repeat_Rich_SL2.40ch10_4550001_41450000
S_lycopersicum_SL2_40ch10	Circos	BAND	41450001	41900000	.	+	.	ID=Intermediate_SL2.40ch10_41450001_41900000
S_lycopersicum_SL2_40ch10	Circos	BAND	41900001	42350000	.	+	.	ID=Repeat_Rich_SL2.40ch10_41900001_42350000
S_lycopersicum_SL2_40ch10	Circos	BAND	42350001	42800000	.	+	.	ID=Intermediate_SL2.40ch10_42350001_42800000
S_lycopersicum_SL2_40ch10	Circos	BAND	42800001	43250000	.	+	.	ID=Repeat_Rich_SL2.40ch10_42800001_43250000
S_lycopersicum_SL2_40ch10	Circos	BAND	43250001	43700000	.	+	.	ID=Intermediate_SL2.40ch10_43250001_43700000
S_lycopersicum_SL2_40ch10	Circos	BAND	43700001	46400000	.	+	.	ID=Repeat_Rich_SL2.40ch10_43700001_46400000
S_lycopersicum_SL2_40ch10	Circos	BAND	46400001	47750000	.	+	.	ID=Intermediate_SL2.40ch10_46400001_47750000
S_lycopersicum_SL2_40ch10	Circos	BAND	47750001	50900000	.	+	.	ID=Repeat_Rich_SL2.40ch10_47750001_50900000
S_lycopersicum_SL2_40ch10	Circos	BAND	50900001	53150000	.	+	.	ID=Intermediate_SL2.40ch10_50900001_53150000
S_lycopersicum_SL2_40ch10	Circos	BAND	53150001	56750000	.	+	.	ID=Repeat_Rich_SL2.40ch10_53150001_56750000
S_lycopersicum_SL2_40ch10	Circos	BAND	56750001	58550000	.	+	.	ID=Intermediate_SL2.40ch10_56750001_58550000
S_lycopersicum_SL2_40ch10	Circos	BAND	58550001	64834305	.	+	.	ID=Repeat_Poor_SL2.40ch10_58550001_64834305
S_lycopersicum_SL2_40ch11	Circos	BAND	1	5900000	.	+	.	ID=Repeat_Poor_SL2.40ch11_1_5900000
S_lycopersicum_SL2_40ch11	Circos	BAND	5900001	9050000	.	+	.	ID=Intermediate_SL2.40ch11_5900001_9050000
S_lycopersicum_SL2_40ch11	Circos	BAND	9050001	9500000	.	+	.	ID=Repeat_Rich_SL2.40ch11_9050001_9500000
S_lycopersicum_SL2_40ch11	Circos	BAND	9500001	9950000	.	+	.	ID=Intermediate_SL2.40ch11_9500001_9950000
S_lycopersicum_SL2_40ch11	Circos	BAND	9950001	11750000	.	+	.	ID=Repeat_Rich_SL2.40ch11_9950001_11750000
S_lycopersicum_SL2_40ch11	Circos	BAND	11750001	12200000	.	+	.	ID=Intermediate_SL2.40ch11_11750001_12200000
S_lycopersicum_SL2_40ch11	Circos	BAND	12200001	34700000	.	+	.	ID=Repeat_Rich_SL2.40ch11_12200001_34700000
S_lycopersicum_SL2_40ch11	Circos	BAND	34700001	36950000	.	+	.	ID=Intermediate_SL2.40ch11_34700001_36950000
S_lycopersicum_SL2_40ch11	Circos	BAND	36950001	42800000	.	+	.	ID=Repeat_Rich_SL2.40ch11_36950001_42800000
S_lycopersicum_SL2_40ch11	Circos	BAND	42800001	43250000	.	+	.	ID=Intermediate_SL2.40ch11_42800001_43250000
S_lycopersicum_SL2_40ch11	Circos	BAND	43250001	45050000	.	+	.	ID=Repeat_Rich_SL2.40ch11_43250001_45050000
S_lycopersicum_SL2_40ch11	Circos	BAND	45050001	49100000	.	+	.	ID=Intermediate_SL2.40ch11_45050001_49100000
S_lycopersicum_SL2_40ch11	Circos	BAND	49100001	53386025	.	+	.	ID=Repeat_Poor_SL2.40ch11_49100001_53386025
S_lycopersicum_SL2_40ch12	Circos	BAND	1	4100000	.	+	.	ID=Repeat_Poor_SL2.40ch12_1_4100000
S_lycopersicum_SL2_40ch12	Circos	BAND	4100001	4550000	.	+	.	ID=Intermediate_SL2.40ch12_4100001_4550000
S_lycopersicum_SL2_40ch12	Circos	BAND	4550001	5000000	.	+	.	ID=Repeat_Poor_SL2.40ch12_4550001_5000000
S_lycopersicum_SL2_40ch12	Circos	BAND	5000001	5900000	.	+	.	ID=Intermediate_SL2.40ch12_5000001_5900000
S_lycopersicum_SL2_40ch12	Circos	BAND	5900001	6350000	.	+	.	ID=Repeat_Rich_SL2.40ch12_5900001_6350000
S_lycopersicum_SL2_40ch12	Circos	BAND	6350001	7700000	.	+	.	ID=Intermediate_SL2.40ch12_6350001_7700000
S_lycopersicum_SL2_40ch12	Circos	BAND	7700001	14000000	.	+	.	ID=Repeat_Rich_SL2.40ch12_7700001_14000000
S_lycopersicum_SL2_40ch12	Circos	BAND	14000001	14450000	.	+	.	ID=Intermediate_SL2.40ch12_14000001_14450000
S_lycopersicum_SL2_40ch12	Circos	BAND	14450001	28850000	.	+	.	ID=Repeat_Rich_SL2.40ch12_14450001_28850000
S_lycopersicum_SL2_40ch12	Circos	BAND	28850001	29300000	.	+	.	ID=Intermediate_SL2.40ch12_28850001_29300000
S_lycopersicum_SL2_40ch12	Circos	BAND	29300001	35600000	.	+	.	ID=Repeat_Rich_SL2.40ch12_29300001_35600000
S_lycopersicum_SL2_40ch12	Circos	BAND	35600001	36050000	.	+	.	ID=Intermediate_SL2.40ch12_35600001_36050000
S_lycopersicum_SL2_40ch12	Circos	BAND	36050001	40550000	.	+	.	ID=Repeat_Rich_SL2.40ch12_36050001_40550000
S_lycopersicum_SL2_40ch12	Circos	BAND	40550001	41000000	.	+	.	ID=Intermediate_SL2.40ch12_40550001_41000000
S_lycopersicum_SL2_40ch12	Circos	BAND	41000001	42800000	.	+	.	ID=Repeat_Rich_SL2.40ch12_41000001_42800000
S_lycopersicum_SL2_40ch12	Circos	BAND	42800001	47300000	.	+	.	ID=Intermediate_SL2.40ch12_42800001_47300000
S_lycopersicum_SL2_40ch12	Circos	BAND	47300001	47750000	.	+	.	ID=Repeat_Poor_SL2.40ch12_47300001_47750000
S_lycopersicum_SL2_40ch12	Circos	BAND	47750001	48200000	.	+	.	ID=Intermediate_SL2.40ch12_47750001_48200000
S_lycopersicum_SL2_40ch12	Circos	BAND	48200001	48650000	.	+	.	ID=Repeat_Poor_SL2.40ch12_48200001_48650000
S_lycopersicum_SL2_40ch12	Circos	BAND	48650001	61700000	.	+	.	ID=Repeat_Rich_SL2.40ch12_48650001_61700000
S_lycopersicum_SL2_40ch12	Circos	BAND	61700001	65486253	.	+	.	ID=Repeat_Poor_SL2.40ch12_61700001_65486253

## Sheet: SUPTABLE3
Table S3 Names of identified TE-genes. List of ID and name of each gene identified as a TE-gene.
ID	Name
3456734	Solyc00g005020
3456756	Solyc00g005070
3456770	Solyc00g005100
3456784	Solyc00g005130
3456789	Solyc00g005140
3456793	Solyc00g005150
3456798	Solyc00g005160
3456803	Solyc00g005170
3456818	Solyc00g005420
3456851	Solyc00g005490
3456867	Solyc00g005860
3456872	Solyc00g005870
3456877	Solyc00g005880
3456906	Solyc00g006050
3456924	Solyc00g006470
3456973	Solyc00g006570
3456982	Solyc00g006600
3456987	Solyc00g006630
3457016	Solyc00g006700
3457200	Solyc00g007210
3457211	Solyc00g007230
3457215	Solyc00g007240
3457219	Solyc00g007250
3457237	Solyc00g007290
3457249	Solyc00g007310
3457281	Solyc00g007560
3457291	Solyc00g007580
3457296	Solyc00g007590
3457305	Solyc00g007610
3457454	Solyc00g008690
3457463	Solyc00g008900
3457472	Solyc00g008920
3457554	Solyc00g009240
3457558	Solyc00g009440
3457562	Solyc00g009540
3457571	Solyc00g009660
3457581	Solyc00g009770
3457585	Solyc00g009780
3457594	Solyc00g009800
3457598	Solyc00g010100
3457602	Solyc00g010110
3457606	Solyc00g010210
3457627	Solyc00g010540
3457631	Solyc00g010550
3457641	Solyc00g010760
3457655	Solyc00g010790
3457668	Solyc00g011130
3457672	Solyc00g011140
3457689	Solyc00g011180
3457693	Solyc00g011310
3457735	Solyc00g012090
3457739	Solyc00g012310
3457790	Solyc00g012800
3457794	Solyc00g012900
3457798	Solyc00g013000
3457852	Solyc00g013320
3457856	Solyc00g013330
3457931	Solyc00g014970
3457954	Solyc00g015610
3458041	Solyc00g017530
3458055	Solyc00g017750
3458402	Solyc00g024170
3458505	Solyc00g027120
3458510	Solyc00g027130
3458515	Solyc00g027140
3458546	Solyc00g027870
3458870	Solyc00g038390
3458936	Solyc00g042640
3458965	Solyc00g045570
3458970	Solyc00g046570
3458975	Solyc00g046580
3458980	Solyc00g046980
3459002	Solyc00g047810
3459006	Solyc00g048410
3459136	Solyc00g058280
3459146	Solyc00g058490
3459187	Solyc00g062710
3459238	Solyc00g066350
3459242	Solyc00g066360
3459247	Solyc00g066370
3459251	Solyc00g067470
3459323	Solyc00g073200
3459362	Solyc00g075040
3459367	Solyc00g075440
3459388	Solyc00g080550
3459406	Solyc00g082550
3459421	Solyc00g084760
3459426	Solyc00g084770
3459443	Solyc00g085370
3459560	Solyc00g093300
3459565	Solyc00g093310
3459596	Solyc00g094850
3459632	Solyc00g097760
3459740	Solyc00g105340
3459745	Solyc00g105350
3459749	Solyc00g105750
3459762	Solyc00g107550
3459879	Solyc00g113230
3459883	Solyc00g113330
3459904	Solyc00g116150
3459953	Solyc00g121730
3459999	Solyc00g125580
3460119	Solyc00g131710
3460229	Solyc00g144470
3460245	Solyc00g147770
3460314	Solyc00g165080
3460327	Solyc00g166190
3460331	Solyc00g166490
3460336	Solyc00g166690
3460407	Solyc00g175240
3460421	Solyc00g179640
3460426	Solyc00g179840
3460486	Solyc00g188250
3460501	Solyc00g192150
3460506	Solyc00g195350
3460510	Solyc00g195360
3460530	Solyc00g199960
3460546	Solyc00g201460
3460551	Solyc00g201760
3460624	Solyc00g222460
3460645	Solyc00g229260
3460707	Solyc00g246800
3460869	Solyc00g294630
3460878	Solyc00g300430
3460897	Solyc00g304630
3460902	Solyc00g306730
3460938	Solyc00g313530
3460946	Solyc00g316030
3460955	Solyc00g316730
3460960	Solyc00g318030
3460983	Solyc00g322830
3460995	Solyc00g324530
3462492	Solyc01g007390
3462739	Solyc01g007820
3463319	Solyc01g008750
3463761	Solyc01g009460
3463952	Solyc01g009800
3464037	Solyc01g009950
3464072	Solyc01g010010
3464124	Solyc01g010100
3464129	Solyc01g010110
3464134	Solyc01g010120
3464254	Solyc01g010320
3464259	Solyc01g010330
3464264	Solyc01g010340
3464333	Solyc01g010450
3464424	Solyc01g010610
3464429	Solyc01g010630
3464459	Solyc01g010680
3464531	Solyc01g010800
3464719	Solyc01g011130
3464724	Solyc01g011150
3464831	Solyc01g011400
3464937	Solyc01g012620
3465157	Solyc01g014080
3465217	Solyc01g014190
3465221	Solyc01g014200
3465263	Solyc01g014280
3465294	Solyc01g014340
3465378	Solyc01g014500
3465412	Solyc01g014570
3465417	Solyc01g014580
3465421	Solyc01g014600
3465426	Solyc01g014610
3465434	Solyc01g014630
3465541	Solyc01g014870
3465547	Solyc01g014880
3465553	Solyc01g014890
3465558	Solyc01g014900
3465582	Solyc01g014950
3465656	Solyc01g015090
3465661	Solyc01g015100
3465665	Solyc01g015110
3465670	Solyc01g015120
3465685	Solyc01g015150
3465689	Solyc01g015160
3465701	Solyc01g015190
3465716	Solyc01g015220
3465733	Solyc01g015260
3465737	Solyc01g015270
3465750	Solyc01g015300
3465759	Solyc01g016310
3465763	Solyc01g016320
3465767	Solyc01g016330
3465772	Solyc01g016340
3465870	Solyc01g016570
3465887	Solyc01g016610
3465934	Solyc01g016710
3465948	Solyc01g016740
3465952	Solyc01g016750
3466002	Solyc01g016860
3466043	Solyc01g016950
3466061	Solyc01g016990
3466066	Solyc01g017000
3466319	Solyc01g017550
3466333	Solyc01g017580
3466337	Solyc01g017590
3466427	Solyc01g017780
3466441	Solyc01g017810
3466449	Solyc01g017830
3466453	Solyc01g017840
3466458	Solyc01g017850
3466474	Solyc01g017880
3466492	Solyc01g017920
3466522	Solyc01g017980
3466640	Solyc01g020210
3466663	Solyc01g020250
3466673	Solyc01g020270
3466692	Solyc01g020310
3466728	Solyc01g020380
3466742	Solyc01g020410
3466797	Solyc01g020530
3466802	Solyc01g020550
3466807	Solyc01g020560
3466816	Solyc01g020580
3466821	Solyc01g020590
3466825	Solyc01g020600
3466858	Solyc01g021650
3466863	Solyc01g021660
3466887	Solyc01g021710
3466934	Solyc01g022790
3466958	Solyc01g028840
3466963	Solyc01g028850
3466982	Solyc01g028880
3466987	Solyc01g028890
3467004	Solyc01g028920
3467015	Solyc01g028940
3467020	Solyc01g028950
3467030	Solyc01g028970
3467041	Solyc01g033980
3467051	Solyc01g034000
3467056	Solyc01g034010
3467068	Solyc01g034030
3467072	Solyc01g034040
3467095	Solyc01g034090
3467099	Solyc01g034100
3467104	Solyc01g034110
3467109	Solyc01g034120
3467114	Solyc01g034130
3467130	Solyc01g034160
3467147	Solyc01g034200
3467165	Solyc01g038220
3467181	Solyc01g044250
3467193	Solyc01g044290
3467203	Solyc01g044320
3467208	Solyc01g044330
3467239	Solyc01g044380
3467244	Solyc01g044390
3467249	Solyc01g044400
3467254	Solyc01g044410
3467265	Solyc01g044430
3467270	Solyc01g044440
3467280	Solyc01g044470
3467326	Solyc01g045570
3467331	Solyc01g045580
3467351	Solyc01g048600
3467355	Solyc01g048610
3467360	Solyc01g049610
3467385	Solyc01g049670
3467403	Solyc01g049700
3467408	Solyc01g049710
3467437	Solyc01g049780
3467445	Solyc01g049800
3467471	Solyc01g049850
3467476	Solyc01g049860
3467512	Solyc01g049930
3467539	Solyc01g049990
3467543	Solyc01g050000
3467575	Solyc01g050060
3467581	Solyc01g050080
3467604	Solyc01g056210
3467650	Solyc01g056300
3467677	Solyc01g056350
3467747	Solyc01g056490
3467752	Solyc01g056510
3467768	Solyc01g056550
3467773	Solyc01g056560
3467831	Solyc01g056680
3467842	Solyc01g056700
3467863	Solyc01g056740
3467907	Solyc01g056820
3467928	Solyc01g056860
3468165	Solyc01g057360
3468186	Solyc01g057400
3468211	Solyc01g057450
3468227	Solyc01g057480
3468259	Solyc01g057540
3468264	Solyc01g057550
3468300	Solyc01g057620
3468304	Solyc01g057630
3468313	Solyc01g057650
3468343	Solyc01g057710
3468347	Solyc01g057720
3468386	Solyc01g057790
3468423	Solyc01g057860
3468431	Solyc01g057880
3468436	Solyc01g057890
3468459	Solyc01g057930
3468474	Solyc01g057970
3468560	Solyc01g058150
3468640	Solyc01g058300
3468644	Solyc01g058310
3468675	Solyc01g058370
3468707	Solyc01g058430
3468737	Solyc01g058490
3468776	Solyc01g058560
3468781	Solyc01g058570
3468786	Solyc01g058580
3468800	Solyc01g058610
3468805	Solyc01g058620
3468810	Solyc01g058630
3468815	Solyc01g058640
3468853	Solyc01g058710
3469000	Solyc01g059970
3469011	Solyc01g059990
3469016	Solyc01g060000
3469078	Solyc01g060110
3469083	Solyc01g060120
3469125	Solyc01g060190
3469145	Solyc01g060230
3469182	Solyc01g060290
3469186	Solyc01g060300
3469196	Solyc01g060320
3469200	Solyc01g060330
3469213	Solyc01g060360
3469274	Solyc01g060480
3469304	Solyc01g065520
3469485	Solyc01g065860
3469490	Solyc01g065870
3469494	Solyc01g065880
3469522	Solyc01g065940
3469527	Solyc01g065950
3469548	Solyc01g065990
3469567	Solyc01g066030
3469640	Solyc01g066170
3469645	Solyc01g066180
3469663	Solyc01g066220
3469673	Solyc01g066240
3469678	Solyc01g066250
3469840	Solyc01g066530
3470053	Solyc01g066930
3470069	Solyc01g066960
3470118	Solyc01g067050
3470344	Solyc01g067430
3470354	Solyc01g067450
3470670	Solyc01g067970
3470828	Solyc01g068230
3471765	Solyc01g079730
3471968	Solyc01g080060
3472185	Solyc01g080390
3472401	Solyc01g080740
3474328	Solyc01g088840
3474627	Solyc01g090330
3474773	Solyc01g090570
3474779	Solyc01g090580
3476175	Solyc01g094740
3476766	Solyc01g095660
3476917	Solyc01g095910
3478547	Solyc01g098510
3481509	Solyc01g104120
3483123	Solyc01g106660
3483128	Solyc01g106670
3483590	Solyc01g107400
3484389	Solyc01g108690
3484558	Solyc01g108980
3485621	Solyc01g110650
3485647	Solyc01g110690
3485680	Solyc01g110740
3485686	Solyc01g110750
3486137	Solyc01g111480
3486142	Solyc01g111490
3486713	Solyc01g112360
3486728	Solyc01g112400
3486732	Solyc01g113430
3486740	Solyc01g113460
3486744	Solyc01g113470
3486748	Solyc01g113480
3486752	Solyc01g113490
3486756	Solyc01g113500
3486782	Solyc02g005090
3486803	Solyc02g005130
3486814	Solyc02g005150
3486818	Solyc02g005160
3486822	Solyc02g005170
3486833	Solyc02g005190
3486857	Solyc02g005240
3486862	Solyc02g005250
3486867	Solyc02g005270
3487000	Solyc02g005540
3487249	Solyc02g014100
3487259	Solyc02g014120
3487280	Solyc02g014160
3487301	Solyc02g014200
3487306	Solyc02g014210
3487331	Solyc02g014260
3487336	Solyc02g014270
3487340	Solyc02g014280
3487365	Solyc02g014330
3487399	Solyc02g014390
3487412	Solyc02g014420
3487557	Solyc02g014710
3487584	Solyc02g014760
3487713	Solyc02g020990
3487737	Solyc02g021030
3487742	Solyc02g021040
3487759	Solyc02g021070
3487764	Solyc02g021080
3487768	Solyc02g021090
3487781	Solyc02g021110
3487786	Solyc02g021120
3487791	Solyc02g021130
3487826	Solyc02g021200
3487877	Solyc02g021300
3487882	Solyc02g021310
3487887	Solyc02g021320
3487963	Solyc02g021460
3487986	Solyc02g021500
3487994	Solyc02g021530
3488012	Solyc02g021570
3488092	Solyc02g021710
3488096	Solyc02g021720
3488100	Solyc02g021730
3488104	Solyc02g021740
3488109	Solyc02g021750
3488130	Solyc02g021790
3488154	Solyc02g022840
3488219	Solyc02g023960
3488285	Solyc02g025080
3488333	Solyc02g030140
3488338	Solyc02g030150
3488343	Solyc02g030160
3488455	Solyc02g030390
3488459	Solyc02g030400
3488488	Solyc02g030470
3488597	Solyc02g031720
3488602	Solyc02g031730
3488674	Solyc02g031880
3488985	Solyc02g032500
3489002	Solyc02g032530
3489103	Solyc02g032750
3489170	Solyc02g032880
3489175	Solyc02g032890
3489231	Solyc02g033000
3489236	Solyc02g033010
3489445	Solyc02g036400
3489449	Solyc02g036410
3489454	Solyc02g036420
3489495	Solyc02g036490
3489515	Solyc02g037520
3489536	Solyc02g037560
3489541	Solyc02g037570
3489546	Solyc02g037580
3489555	Solyc02g037610
3489560	Solyc02g037620
3489569	Solyc02g037640
3489664	Solyc02g043840
3489669	Solyc02g043850
3489699	Solyc02g043930
3489735	Solyc02g044010
3489781	Solyc02g049110
3489791	Solyc02g050120
3489796	Solyc02g050130
3489806	Solyc02g050150
3489810	Solyc02g050160
3489841	Solyc02g050220
3489852	Solyc02g050250
3489885	Solyc02g050310
3489898	Solyc02g055330
3489902	Solyc02g055340
3489907	Solyc02g055350
3489912	Solyc02g055360
3489923	Solyc02g055380
3489932	Solyc02g055400
3489936	Solyc02g055420
3489966	Solyc02g055480
3489971	Solyc02g055490
3489981	Solyc02g055510
3489985	Solyc02g055520
3490161	Solyc02g061830
3490511	Solyc02g062450
3490527	Solyc02g062480
3491499	Solyc02g065120
3491504	Solyc02g065130
3492062	Solyc02g067130
3492067	Solyc02g067140
3492907	Solyc02g068570
3494069	Solyc02g070590
3494683	Solyc02g071650
3496073	Solyc02g078070
3496092	Solyc02g078110
3497844	Solyc02g081090
3497848	Solyc02g081100
3497853	Solyc02g081110
3498251	Solyc02g081790
3498718	Solyc02g082580
3498750	Solyc02g082640
3499575	Solyc02g084010
3499726	Solyc02g084320
3500544	Solyc02g085680
3502455	Solyc02g088960
3502470	Solyc02g088990
3502475	Solyc02g089000
3503092	Solyc02g090050
3503580	Solyc02g090880
3505312	Solyc02g093780
3505464	Solyc02g094020
3505839	Solyc02g094650
3505843	Solyc02g094660
3505847	Solyc02g094680
3505851	Solyc02g094690
3505855	Solyc02g094700
3505860	Solyc02g094720
3505864	Solyc02g094730
3505880	Solyc02g094810
3505884	Solyc02g094820
3506220	Solyc03g005540
3506225	Solyc03g005550
3507761	Solyc03g013120
3507795	Solyc03g013190
3507800	Solyc03g013200
3507805	Solyc03g013210
3507831	Solyc03g013260
3507836	Solyc03g013270
3507877	Solyc03g013350
3507881	Solyc03g013360
3507988	Solyc03g013590
3509958	Solyc03g033870
3509999	Solyc03g033960
3510150	Solyc03g034210
3510225	Solyc03g034340
3510231	Solyc03g034360
3510326	Solyc03g042540
3510378	Solyc03g043650
3510390	Solyc03g043670
3510394	Solyc03g043680
3510399	Solyc03g043690
3510558	Solyc03g043980
3510606	Solyc03g044070
3510658	Solyc03g044170
3510734	Solyc03g044310
3510739	Solyc03g044320
3510759	Solyc03g044360
3510776	Solyc03g044390
3510781	Solyc03g044400
3510833	Solyc03g044500
3510855	Solyc03g044550
3510863	Solyc03g044570
3510882	Solyc03g044610
3510898	Solyc03g044640
3510972	Solyc03g044840
3510985	Solyc03g044870
3511021	Solyc03g044940
3511132	Solyc03g046160
3511137	Solyc03g046170
3511146	Solyc03g046190
3511154	Solyc03g046220
3511159	Solyc03g046230
3511164	Solyc03g046240
3511278	Solyc03g046460
3511289	Solyc03g046480
3511330	Solyc03g051600
3511335	Solyc03g051610
3511345	Solyc03g051630
3511398	Solyc03g051740
3511403	Solyc03g051750
3511452	Solyc03g051890
3511464	Solyc03g051910
3511482	Solyc03g051940
3511541	Solyc03g053030
3511569	Solyc03g053090
3511619	Solyc03g058170
3511624	Solyc03g058180
3511666	Solyc03g058270
3511738	Solyc03g058410
3511772	Solyc03g058480
3511812	Solyc03g058560
3511830	Solyc03g058620
3511846	Solyc03g058660
3511850	Solyc03g058670
3511859	Solyc03g058690
3511880	Solyc03g058740
3511884	Solyc03g058750
3511893	Solyc03g058790
3511907	Solyc03g058820
3511915	Solyc03g058840
3511998	Solyc03g058980
3512007	Solyc03g059000
3512117	Solyc03g059210
3512122	Solyc03g059220
3512157	Solyc03g059280
3512175	Solyc03g059320
3512179	Solyc03g059330
3512219	Solyc03g059410
3512234	Solyc03g059440
3512239	Solyc03g059450
3512243	Solyc03g059460
3512268	Solyc03g060500
3512285	Solyc03g060530
3512394	Solyc03g062730
3512410	Solyc03g062760
3512415	Solyc03g062770
3512450	Solyc03g062840
3512455	Solyc03g062850
3512460	Solyc03g062860
3512465	Solyc03g062870
3512568	Solyc03g063080
3512589	Solyc03g063120
3512593	Solyc03g063130
3512615	Solyc03g063170
3512664	Solyc03g063270
3512712	Solyc03g063360
3512732	Solyc03g063400
3512737	Solyc03g063410
3512871	Solyc03g063740
3512914	Solyc03g063820
3512936	Solyc03g063890
3512946	Solyc03g063910
3512956	Solyc03g063930
3512960	Solyc03g063940
3512969	Solyc03g063960
3513061	Solyc03g065170
3513082	Solyc03g065220
3513216	Solyc03g071510
3513252	Solyc03g071580
3513331	Solyc03g071740
3513352	Solyc03g071780
3513437	Solyc03g077940
3513451	Solyc03g077970
3513487	Solyc03g078040
3513583	Solyc03g078220
3513641	Solyc03g078340
3513677	Solyc03g078410
3513742	Solyc03g078540
3513747	Solyc03g078550
3513813	Solyc03g078680
3513846	Solyc03g078740
3513851	Solyc03g078750
3513894	Solyc03g078850
3514536	Solyc03g082930
3514709	Solyc03g083220
3514714	Solyc03g083230
3515009	Solyc03g083740
3515013	Solyc03g083760
3515027	Solyc03g083790
3515032	Solyc03g083800
3515039	Solyc03g083810
3515058	Solyc03g083850
3515063	Solyc03g083860
3515111	Solyc03g083950
3515185	Solyc03g093090
3515190	Solyc03g093100
3515467	Solyc03g093580
3515471	Solyc03g093590
3515475	Solyc03g093600
3515506	Solyc03g093660
3515511	Solyc03g093670
3515629	Solyc03g093900
3515649	Solyc03g093950
3515653	Solyc03g093960
3515871	Solyc03g095340
3515898	Solyc03g095390
3515903	Solyc03g095400
3515988	Solyc03g095560
3515992	Solyc03g095580
3515997	Solyc03g095590
3516019	Solyc03g095630
3516023	Solyc03g095640
3516102	Solyc03g095790
3516178	Solyc03g095930
3516219	Solyc03g096010
3516224	Solyc03g096020
3516249	Solyc03g096060
3516359	Solyc03g096270
3516385	Solyc03g096330
3516390	Solyc03g096340
3516428	Solyc03g096400
3516445	Solyc03g096440
3516462	Solyc03g096470
3516504	Solyc03g096570
3516509	Solyc03g096580
3516559	Solyc03g096690
3517759	Solyc03g098690
3517826	Solyc03g104840
3518206	Solyc03g111480
3518211	Solyc03g111490
3520311	Solyc03g115130
3520907	Solyc03g116180
3520919	Solyc03g116210
3520971	Solyc03g116300
3520975	Solyc03g116310
3522578	Solyc03g119000
3523876	Solyc03g121150
3523881	Solyc03g121160
3524245	Solyc03g121750
3524504	Solyc03g122200
3524508	Solyc03g122210
3524513	Solyc03g122220
3527307	Solyc04g009890
3527761	Solyc04g011660
3527907	Solyc04g011970
3527992	Solyc04g012130
3528243	Solyc04g014580
3528248	Solyc04g014590
3528271	Solyc04g014640
3528283	Solyc04g014660
3528398	Solyc04g014860
3528618	Solyc04g015230
3528663	Solyc04g015310
3528668	Solyc04g015320
3528726	Solyc04g015420
3528864	Solyc04g015650
3528874	Solyc04g015670
3528974	Solyc04g015860
3528979	Solyc04g015870
3528984	Solyc04g015880
3528989	Solyc04g015890
3528994	Solyc04g015910
3528999	Solyc04g015920
3529097	Solyc04g016100
3529115	Solyc04g016140
3529208	Solyc04g016300
3529217	Solyc04g016320
3529229	Solyc04g016340
3529329	Solyc04g016500
3529463	Solyc04g017730
3529507	Solyc04g017820
3529574	Solyc04g017970
3529579	Solyc04g017980
3529584	Solyc04g017990
3529676	Solyc04g018200
3529696	Solyc04g018240
3529719	Solyc04g018290
3529727	Solyc04g018310
3529735	Solyc04g019320
3529740	Solyc04g019330
3529756	Solyc04g024350
3529761	Solyc04g024370
3529769	Solyc04g024390
3529774	Solyc04g024410
3529792	Solyc04g024440
3529800	Solyc04g024460
3529804	Solyc04g024470
3529879	Solyc04g024610
3529884	Solyc04g024620
3529889	Solyc04g024630
3529903	Solyc04g024660
3529908	Solyc04g024670
3529913	Solyc04g024680
3529921	Solyc04g024700
3529949	Solyc04g024760
3529989	Solyc04g024850
3529993	Solyc04g024860
3530007	Solyc04g024900
3530021	Solyc04g024930
3530105	Solyc04g025140
3530110	Solyc04g025150
3530163	Solyc04g025250
3530175	Solyc04g025270
3530199	Solyc04g025310
3530212	Solyc04g025340
3530230	Solyc04g025380
3530234	Solyc04g025390
3530250	Solyc04g025420
3530300	Solyc04g025520
3530352	Solyc04g025620
3530377	Solyc04g025680
3530386	Solyc04g025700
3530395	Solyc04g025720
3530434	Solyc04g025800
3530444	Solyc04g025830
3530477	Solyc04g025890
3530481	Solyc04g025900
3530507	Solyc04g025950
3530512	Solyc04g025960
3530682	Solyc04g026330
3530746	Solyc04g028450
3530759	Solyc04g028480
3530763	Solyc04g028490
3530768	Solyc04g028500
3530773	Solyc04g028530
3530798	Solyc04g028590
3530803	Solyc04g028600
3530812	Solyc04g039610
3530824	Solyc04g039630
3530829	Solyc04g039640
3530847	Solyc04g039680
3530860	Solyc04g039710
3530864	Solyc04g039720
3530875	Solyc04g039740
3531040	Solyc04g040060
3531045	Solyc04g040070
3531049	Solyc04g040080
3531061	Solyc04g040100
3531179	Solyc04g045370
3531232	Solyc04g045490
3531237	Solyc04g045500
3531359	Solyc04g047730
3531416	Solyc04g047850
3531491	Solyc04g048990
3531513	Solyc04g049030
3531517	Solyc04g049040
3531521	Solyc04g049050
3531525	Solyc04g049060
3531554	Solyc04g049110
3531772	Solyc04g049510
3531777	Solyc04g049520
3531800	Solyc04g049560
3531873	Solyc04g049700
3531936	Solyc04g049830
3531970	Solyc04g049900
3532035	Solyc04g050020
3532140	Solyc04g050230
3532163	Solyc04g050280
3532168	Solyc04g050290
3532197	Solyc04g050350
3532309	Solyc04g050580
3532314	Solyc04g050590
3532318	Solyc04g050600
3532340	Solyc04g050690
3532499	Solyc04g051000
3532503	Solyc04g051010
3532550	Solyc04g051110
3532636	Solyc04g051300
3532713	Solyc04g051430
3532718	Solyc04g051440
3532760	Solyc04g051520
3532765	Solyc04g051530
3532887	Solyc04g051740
3532914	Solyc04g051810
3532932	Solyc04g051840
3532959	Solyc04g051890
3533043	Solyc04g053060
3533135	Solyc04g054230
3533198	Solyc04g054350
3533234	Solyc04g054420
3533298	Solyc04g054530
3533312	Solyc04g054620
3533480	Solyc04g054920
3533555	Solyc04g055070
3533694	Solyc04g056300
3533784	Solyc04g056460
3533946	Solyc04g057790
3533951	Solyc04g057800
3534078	Solyc04g058020
3534508	Solyc04g064780
3534688	Solyc04g071090
3534694	Solyc04g071100
3534698	Solyc04g071110
3534734	Solyc04g071170
3534846	Solyc04g071380
3534851	Solyc04g071390
3534892	Solyc04g071460
3534932	Solyc04g071530
3535048	Solyc04g071720
3535145	Solyc04g071910
3535908	Solyc04g074200
3535912	Solyc04g074210
3536126	Solyc04g074600
3536130	Solyc04g074610
3536469	Solyc04g076160
3537618	Solyc04g078100
3537882	Solyc04g078570
3537887	Solyc04g078580
3539776	Solyc04g081680
3541999	Solyc05g007340
3542701	Solyc05g008550
3543937	Solyc05g010690
3544613	Solyc05g012830
3545013	Solyc05g013550
3545292	Solyc05g014020
3545569	Solyc05g014520
3545644	Solyc05g014660
3545648	Solyc05g014670
3545653	Solyc05g014680
3545706	Solyc05g014780
3545790	Solyc05g014950
3545795	Solyc05g014960
3545823	Solyc05g015010
3545874	Solyc05g015100
3545879	Solyc05g015130
3545884	Solyc05g015140
3545910	Solyc05g015180
3545915	Solyc05g015190
3545919	Solyc05g015200
3545940	Solyc05g015240
3545991	Solyc05g015340
3546052	Solyc05g015450
3546108	Solyc05g015540
3546118	Solyc05g015560
3546173	Solyc05g015660
3546178	Solyc05g015670
3546183	Solyc05g015680
3546225	Solyc05g015760
3546338	Solyc05g015970
3546358	Solyc05g016010
3546377	Solyc05g016050
3546394	Solyc05g016080
3546399	Solyc05g016090
3546417	Solyc05g016140
3546421	Solyc05g016150
3546429	Solyc05g016170
3546450	Solyc05g016210
3546484	Solyc05g016270
3546517	Solyc05g016350
3546522	Solyc05g016360
3546568	Solyc05g016450
3546581	Solyc05g016480
3546644	Solyc05g016640
3546648	Solyc05g016650
3546715	Solyc05g017800
3546719	Solyc05g017810
3546747	Solyc05g017870
3546774	Solyc05g017920
3546797	Solyc05g017960
3546819	Solyc05g018000
3546850	Solyc05g018090
3546855	Solyc05g018110
3546870	Solyc05g018140
3546939	Solyc05g018260
3546944	Solyc05g018270
3546948	Solyc05g018280
3546953	Solyc05g018290
3547033	Solyc05g018460
3547037	Solyc05g018470
3547074	Solyc05g018530
3547079	Solyc05g018540
3547084	Solyc05g018550
3547149	Solyc05g018660
3547154	Solyc05g018670
3547159	Solyc05g018680
3547164	Solyc05g018690
3547268	Solyc05g018900
3547288	Solyc05g019960
3547293	Solyc05g019970
3547303	Solyc05g019990
3547323	Solyc05g020030
3547337	Solyc05g021080
3547354	Solyc05g021110
3547360	Solyc05g021120
3547374	Solyc05g021150
3547384	Solyc05g021170
3547427	Solyc05g021360
3547436	Solyc05g021380
3547461	Solyc05g021430
3547470	Solyc05g021460
3547475	Solyc05g021470
3547529	Solyc05g021590
3547534	Solyc05g023590
3547560	Solyc05g023650
3547632	Solyc05g023780
3547637	Solyc05g023790
3547693	Solyc05g023910
3547804	Solyc05g024150
3547841	Solyc05g024220
3547866	Solyc05g024280
3547917	Solyc05g024390
3547953	Solyc05g024460
3547958	Solyc05g024470
3548016	Solyc05g025570
3548036	Solyc05g025610
3548153	Solyc05g025830
3548158	Solyc05g025840
3548162	Solyc05g025860
3548216	Solyc05g025960
3548237	Solyc05g026010
3548288	Solyc05g026110
3548293	Solyc05g026120
3548350	Solyc05g026230
3548368	Solyc05g026270
3548373	Solyc05g026280
3548421	Solyc05g026390
3548471	Solyc05g026520
3548503	Solyc05g026580
3548524	Solyc05g031610
3548582	Solyc05g032720
3548618	Solyc05g032790
3548623	Solyc05g032800
3548628	Solyc05g032810
3548638	Solyc05g032830
3548653	Solyc05g032860
3548657	Solyc05g032870
3548673	Solyc05g033910
3548688	Solyc05g039930
3548750	Solyc05g040070
3548755	Solyc05g040080
3548780	Solyc05g041120
3548785	Solyc05g041130
3548817	Solyc05g041190
3548848	Solyc05g041250
3548866	Solyc05g041290
3548923	Solyc05g041410
3548953	Solyc05g041460
3549024	Solyc05g041600
3549038	Solyc05g041630
3549081	Solyc05g041720
3549113	Solyc05g041790
3549118	Solyc05g041800
3549123	Solyc05g041810
3549140	Solyc05g041840
3549186	Solyc05g041930
3549262	Solyc05g042080
3549285	Solyc05g042130
3549289	Solyc05g042140
3549312	Solyc05g042190
3549333	Solyc05g043220
3549346	Solyc05g043250
3549350	Solyc05g043260
3549354	Solyc05g043270
3549359	Solyc05g043280
3549407	Solyc05g043370
3549486	Solyc05g044520
3549491	Solyc05g044530
3549545	Solyc05g045630
3549550	Solyc05g045640
3549700	Solyc05g045960
3549715	Solyc05g045990
3549752	Solyc05g046050
3549757	Solyc05g046060
3549762	Solyc05g046070
3549772	Solyc05g046090
3549854	Solyc05g046250
3549859	Solyc05g046260
3549987	Solyc05g047500
3550058	Solyc05g047620
3550062	Solyc05g047630
3550073	Solyc05g047650
3550108	Solyc05g047730
3550112	Solyc05g047740
3550413	Solyc05g050260
3550417	Solyc05g050270
3550473	Solyc05g050370
3551164	Solyc05g051600
3551426	Solyc05g052060
3553570	Solyc05g055670
3554464	Solyc06g005540
3554914	Solyc06g007290
3554978	Solyc06g007400
3555171	Solyc06g007750
3555315	Solyc06g008000
3555964	Solyc06g009100
3556085	Solyc06g009300
3556094	Solyc06g009320
3556176	Solyc06g009460
3556229	Solyc06g009560
3556242	Solyc06g009590
3556301	Solyc06g009700
3556312	Solyc06g009720
3556316	Solyc06g009730
3556321	Solyc06g009740
3556484	Solyc06g010080
3556606	Solyc06g011300
3556610	Solyc06g011310
3556651	Solyc06g011390
3556661	Solyc06g011410
3556666	Solyc06g011420
3556670	Solyc06g011430
3556772	Solyc06g011640
3556776	Solyc06g011650
3556823	Solyc06g016740
3556858	Solyc06g016810
3556867	Solyc06g016830
3556872	Solyc06g016840
3556896	Solyc06g017880
3556942	Solyc06g018010
3556947	Solyc06g018020
3556952	Solyc06g018030
3556957	Solyc06g018040
3556969	Solyc06g018060
3556974	Solyc06g018070
3557068	Solyc06g024250
3557072	Solyc06g024260
3557076	Solyc06g024270
3557081	Solyc06g024280
3557085	Solyc06g024290
3557089	Solyc06g024300
3557113	Solyc06g024350
3557117	Solyc06g024360
3557173	Solyc06g030500
3557204	Solyc06g030560
3557302	Solyc06g032750
3557306	Solyc06g032760
3557310	Solyc06g033760
3557315	Solyc06g033770
3557350	Solyc06g033840
3557416	Solyc06g033980
3557462	Solyc06g034070
3557562	Solyc06g034260
3557623	Solyc06g034400
3557671	Solyc06g035470
3557675	Solyc06g035480
3557687	Solyc06g035500
3557692	Solyc06g035510
3557737	Solyc06g035590
3557765	Solyc06g035640
3557769	Solyc06g035650
3557778	Solyc06g035670
3557810	Solyc06g035740
3557815	Solyc06g035750
3557838	Solyc06g035800
3557881	Solyc06g035890
3557943	Solyc06g036010
3558018	Solyc06g036140
3558022	Solyc06g036150
3558079	Solyc06g036270
3558104	Solyc06g036320
3558127	Solyc06g036360
3558132	Solyc06g036370
3558137	Solyc06g036380
3558142	Solyc06g036390
3558197	Solyc06g036510
3558206	Solyc06g036530
3558238	Solyc06g036610
3558259	Solyc06g036650
3558287	Solyc06g036710
3558315	Solyc06g036790
3558325	Solyc06g036810
3558330	Solyc06g036820
3558363	Solyc06g042970
3558398	Solyc06g043040
3558402	Solyc06g043050
3558424	Solyc06g043100
3558464	Solyc06g043180
3558474	Solyc06g043230
3558479	Solyc06g043240
3558516	Solyc06g043360
3558521	Solyc06g043370
3558592	Solyc06g048490
3558597	Solyc06g048500
3558630	Solyc06g048550
3558647	Solyc06g048580
3558706	Solyc06g048690
3558742	Solyc06g048760
3558802	Solyc06g048880
3558861	Solyc06g048980
3558937	Solyc06g050100
3559076	Solyc06g050380
3559081	Solyc06g050390
3559091	Solyc06g050410
3559178	Solyc06g050580
3559219	Solyc06g050650
3559224	Solyc06g050660
3559229	Solyc06g050670
3559233	Solyc06g050680
3559269	Solyc06g050740
3559274	Solyc06g050750
3559384	Solyc06g050940
3559395	Solyc06g050970
3559443	Solyc06g051050
3559474	Solyc06g051110
3559566	Solyc06g051280
3559571	Solyc06g051290
3559599	Solyc06g051340
3559676	Solyc06g051490
3559701	Solyc06g051530
3559732	Solyc06g051580
3559765	Solyc06g051640
3559784	Solyc06g051700
3559789	Solyc06g051710
3560119	Solyc06g053270
3560123	Solyc06g053280
3560371	Solyc06g053680
3561074	Solyc06g059940
3561112	Solyc06g060030
3562898	Solyc06g065090
3563302	Solyc06g065770
3563619	Solyc06g066350
3564169	Solyc06g068300
3564692	Solyc06g069160
3564718	Solyc06g069200
3565083	Solyc06g069830
3565088	Solyc06g069840
3567670	Solyc06g075240
3567928	Solyc06g075680
3568205	Solyc06g076190
3570238	Solyc06g084660
3570416	Solyc07g005290
3570908	Solyc07g006080
3572677	Solyc07g009120
3572745	Solyc07g009240
3572750	Solyc07g009250
3572834	Solyc07g009390
3572838	Solyc07g009400
3572877	Solyc07g009480
3573001	Solyc07g014710
3573006	Solyc07g014720
3573029	Solyc07g014760
3573037	Solyc07g015770
3573085	Solyc07g015880
3573090	Solyc07g015890
3573122	Solyc07g015950
3573346	Solyc07g017380
3573351	Solyc07g017390
3573380	Solyc07g017440
3573384	Solyc07g017460
3573392	Solyc07g017480
3573438	Solyc07g017550
3573478	Solyc07g017620
3573516	Solyc07g017690
3573573	Solyc07g017790
3573584	Solyc07g017810
3573592	Solyc07g017830
3573597	Solyc07g017840
3573625	Solyc07g017890
3573637	Solyc07g017910
3573710	Solyc07g018060
3573739	Solyc07g018110
3573743	Solyc07g018120
3573760	Solyc07g018150
3573764	Solyc07g018160
3573811	Solyc07g018260
3573845	Solyc07g018330
3573890	Solyc07g018410
3573895	Solyc07g018420
3573931	Solyc07g019470
3573984	Solyc07g019580
3573989	Solyc07g019590
3573994	Solyc07g019600
3573999	Solyc07g019610
3574014	Solyc07g019640
3574026	Solyc07g019660
3574036	Solyc07g019680
3574045	Solyc07g020700
3574066	Solyc07g020740
3574094	Solyc07g020810
3574189	Solyc07g021010
3574357	Solyc07g021390
3574371	Solyc07g021420
3574376	Solyc07g021430
3574415	Solyc07g021520
3574419	Solyc07g021530
3574438	Solyc07g021560
3574447	Solyc07g021580
3574494	Solyc07g021680
3574498	Solyc07g021690
3574514	Solyc07g021720
3574717	Solyc07g025150
3574738	Solyc07g025190
3574782	Solyc07g025300
3574831	Solyc07g025440
3574841	Solyc07g025460
3574880	Solyc07g026530
3574888	Solyc07g026550
3574980	Solyc07g026750
3574985	Solyc07g026760
3574999	Solyc07g026790
3575014	Solyc07g026820
3575086	Solyc07g026970
3575114	Solyc07g032030
3575118	Solyc07g032040
3575128	Solyc07g032060
3575165	Solyc07g032120
3575186	Solyc07g032160
3575263	Solyc07g032320
3575273	Solyc07g032340
3575278	Solyc07g032350
3575282	Solyc07g032360
3575303	Solyc07g032400
3575307	Solyc07g032410
3575329	Solyc07g032460
3575352	Solyc07g032500
3575366	Solyc07g032540
3575370	Solyc07g032550
3575375	Solyc07g032560
3575445	Solyc07g032720
3575463	Solyc07g032750
3575484	Solyc07g032800
3575489	Solyc07g032810
3575494	Solyc07g032820
3575499	Solyc07g032830
3575655	Solyc07g039270
3575702	Solyc07g039360
3575737	Solyc07g039430
3575754	Solyc07g039460
3575768	Solyc07g039490
3575808	Solyc07g039560
3575823	Solyc07g039590
3575827	Solyc07g039600
3575846	Solyc07g039640
3575864	Solyc07g040670
3575948	Solyc07g040820
3575952	Solyc07g040830
3575966	Solyc07g040860
3575971	Solyc07g040870
3576065	Solyc07g041040
3576095	Solyc07g041130
3576100	Solyc07g041140
3576218	Solyc07g041370
3576222	Solyc07g041380
3576227	Solyc07g041390
3576232	Solyc07g041400
3576238	Solyc07g041410
3576242	Solyc07g041420
3576257	Solyc07g041450
3576292	Solyc07g041520
3576309	Solyc07g041570
3576313	Solyc07g041610
3576353	Solyc07g041690
3576358	Solyc07g041710
3576531	Solyc07g042040
3576536	Solyc07g042050
3576541	Solyc07g042060
3576565	Solyc07g042110
3576570	Solyc07g042120
3576581	Solyc07g042140
3576688	Solyc07g042340
3576693	Solyc07g042350
3576697	Solyc07g042360
3576789	Solyc07g042530
3576932	Solyc07g042790
3577091	Solyc07g043090
3577115	Solyc07g043140
3577148	Solyc07g043210
3577193	Solyc07g043300
3577228	Solyc07g043380
3577254	Solyc07g043430
3577543	Solyc07g044940
3577548	Solyc07g044950
3577916	Solyc07g047630
3578620	Solyc07g051830
3578654	Solyc07g051900
3578658	Solyc07g051910
3578840	Solyc07g052280
3578984	Solyc07g052520
3580028	Solyc07g054360
3581390	Solyc07g061810
3584249	Solyc07g066680
3584442	Solyc08g005320
3584447	Solyc08g005330
3584452	Solyc08g005340
3584458	Solyc08g005350
3584464	Solyc08g005360
3584469	Solyc08g005370
3586315	Solyc08g008560
3586320	Solyc08g008570
3586445	Solyc08g013760
3586450	Solyc08g013770
3586666	Solyc08g014160
3586675	Solyc08g014180
3586686	Solyc08g014200
3586690	Solyc08g014210
3586694	Solyc08g014220
3586711	Solyc08g014250
3586716	Solyc08g014260
3586721	Solyc08g014270
3586749	Solyc08g014320
3586815	Solyc08g014460
3586951	Solyc08g015700
3586955	Solyc08g015710
3586960	Solyc08g015720
3586965	Solyc08g015730
3586975	Solyc08g015750
3586993	Solyc08g015800
3587040	Solyc08g015890
3587050	Solyc08g015910
3587055	Solyc08g015920
3587071	Solyc08g015950
3587154	Solyc08g016130
3587208	Solyc08g016230
3587229	Solyc08g016280
3587234	Solyc08g016290
3587239	Solyc08g016300
3587255	Solyc08g016330
3587312	Solyc08g016450
3587318	Solyc08g016470
3587323	Solyc08g016480
3587328	Solyc08g016490
3587346	Solyc08g016520
3587350	Solyc08g016540
3587374	Solyc08g016600
3587379	Solyc08g016610
3587391	Solyc08g016630
3587417	Solyc08g016700
3587422	Solyc08g016710
3587470	Solyc08g021800
3587474	Solyc08g021810
3587519	Solyc08g021900
3587546	Solyc08g021950
3587620	Solyc08g022090
3587668	Solyc08g022190
3587672	Solyc08g022200
3587696	Solyc08g023250
3587717	Solyc08g023310
3587736	Solyc08g023350
3587754	Solyc08g023390
3587759	Solyc08g023400
3587886	Solyc08g028660
3587895	Solyc08g028680
3587910	Solyc08g028730
3587922	Solyc08g028760
3587934	Solyc08g028790
3587939	Solyc08g028800
3587948	Solyc08g028820
3587953	Solyc08g028830
3588038	Solyc08g029030
3588063	Solyc08g029080
3588111	Solyc08g029180
3588180	Solyc08g029310
3588184	Solyc08g029330
3588193	Solyc08g029350
3588203	Solyc08g029380
3588225	Solyc08g036420
3588229	Solyc08g036430
3588238	Solyc08g036450
3588242	Solyc08g036470
3588247	Solyc08g036480
3588252	Solyc08g036490
3588331	Solyc08g036650
3588378	Solyc08g041730
3588434	Solyc08g041830
3588476	Solyc08g041940
3588481	Solyc08g041950
3588501	Solyc08g041990
3588599	Solyc08g043150
3588625	Solyc08g043200
3588629	Solyc08g043220
3588634	Solyc08g044220
3588639	Solyc08g044230
3588669	Solyc08g044300
3588674	Solyc08g044310
3588698	Solyc08g044360
3588726	Solyc08g044420
3588735	Solyc08g044450
3588770	Solyc08g044520
3588774	Solyc08g044530
3588791	Solyc08g044570
3588823	Solyc08g045650
3588828	Solyc08g045660
3588833	Solyc08g045670
3588837	Solyc08g045680
3588842	Solyc08g045690
3588896	Solyc08g045810
3588901	Solyc08g045830
3588937	Solyc08g047890
3588941	Solyc08g047900
3588946	Solyc08g047910
3588950	Solyc08g047920
3588954	Solyc08g047940
3588968	Solyc08g047970
3588981	Solyc08g048000
3588989	Solyc08g048020
3588993	Solyc08g048030
3588998	Solyc08g048050
3589003	Solyc08g048060
3589016	Solyc08g048090
3589029	Solyc08g048120
3589033	Solyc08g048130
3589037	Solyc08g048140
3589062	Solyc08g048200
3589067	Solyc08g048210
3589090	Solyc08g048260
3589095	Solyc08g048270
3589125	Solyc08g048330
3589129	Solyc08g048340
3589139	Solyc08g048360
3589199	Solyc08g048480
3589286	Solyc08g059720
3589341	Solyc08g060820
3589357	Solyc08g060850
3589387	Solyc08g060910
3589450	Solyc08g061040
3589543	Solyc08g061230
3589570	Solyc08g061280
3589574	Solyc08g061290
3589580	Solyc08g061310
3589591	Solyc08g061330
3589639	Solyc08g061440
3589685	Solyc08g061530
3589690	Solyc08g061540
3589724	Solyc08g061600
3589736	Solyc08g061620
3589861	Solyc08g061860
3589865	Solyc08g061870
3589903	Solyc08g061940
3589945	Solyc08g062020
3589989	Solyc08g062120
3590049	Solyc08g062240
3590058	Solyc08g062260
3590083	Solyc08g062310
3590101	Solyc08g062350
3590126	Solyc08g062400
3590130	Solyc08g062410
3590154	Solyc08g062460
3590158	Solyc08g062470
3590163	Solyc08g062480
3590202	Solyc08g062550
3590300	Solyc08g062740
3590337	Solyc08g062830
3590360	Solyc08g062880
3590413	Solyc08g062980
3590460	Solyc08g063060
3590485	Solyc08g063100
3590521	Solyc08g065180
3590532	Solyc08g065200
3590571	Solyc08g065280
3590576	Solyc08g065290
3590580	Solyc08g065300
3590635	Solyc08g065390
3590640	Solyc08g065400
3590777	Solyc08g065650
3590834	Solyc08g065770
3590922	Solyc08g065920
3590934	Solyc08g065950
3590938	Solyc08g065960
3591005	Solyc08g066080
3591010	Solyc08g066090
3591159	Solyc08g066340
3591175	Solyc08g066370
3591180	Solyc08g066380
3591447	Solyc08g066830
3591553	Solyc08g067010
3591612	Solyc08g067110
3591623	Solyc08g067130
3592412	Solyc08g068550
3592588	Solyc08g068890
3592885	Solyc08g074430
3592936	Solyc08g074530
3593091	Solyc08g074810
3593096	Solyc08g074820
3593137	Solyc08g074900
3594298	Solyc08g076900
3594560	Solyc08g077340
3596253	Solyc08g080330
3597381	Solyc08g082220
3598345	Solyc09g005440
3599087	Solyc09g007690
3599337	Solyc09g008110
3599836	Solyc09g008990
3601261	Solyc09g011460
3601569	Solyc09g011950
3601604	Solyc09g012030
3601616	Solyc09g012060
3601701	Solyc09g014180
3601710	Solyc09g014200
3601780	Solyc09g014330
3601833	Solyc09g014420
3601951	Solyc09g014630
3601955	Solyc09g014640
3601959	Solyc09g014650
3601963	Solyc09g014660
3601968	Solyc09g014670
3601972	Solyc09g014680
3602058	Solyc09g014840
3602063	Solyc09g014850
3602117	Solyc09g014960
3602334	Solyc09g015390
3602339	Solyc09g015410
3602396	Solyc09g015510
3602414	Solyc09g015540
3602418	Solyc09g015550
3602456	Solyc09g015640
3602495	Solyc09g015710
3602500	Solyc09g015720
3602515	Solyc09g015750
3602530	Solyc09g015800
3602692	Solyc09g018100
3602697	Solyc09g018110
3602701	Solyc09g018120
3602738	Solyc09g018190
3602768	Solyc09g018270
3602776	Solyc09g018290
3602822	Solyc09g018380
3602859	Solyc09g018470
3602896	Solyc09g018540
3602904	Solyc09g018560
3602909	Solyc09g018580
3602971	Solyc09g018700
3603012	Solyc09g018770
3603066	Solyc09g018880
3603088	Solyc09g018920
3603098	Solyc09g018940
3603149	Solyc09g020020
3603159	Solyc09g020040
3603173	Solyc09g020080
3603183	Solyc09g020100
3603217	Solyc09g020160
3603234	Solyc09g020200
3603293	Solyc09g025290
3603331	Solyc09g030400
3603336	Solyc09g030410
3603346	Solyc09g030430
3603351	Solyc09g030440
3603372	Solyc09g030480
3603377	Solyc09g030500
3603396	Solyc09g031530
3603489	Solyc09g031720
3603616	Solyc09g031980
3603694	Solyc09g037160
3603713	Solyc09g038190
3603722	Solyc09g040200
3603736	Solyc09g042220
3603745	Solyc09g042240
3603760	Solyc09g042270
3603797	Solyc09g042360
3603806	Solyc09g042380
3603810	Solyc09g042390
3603814	Solyc09g042400
3603818	Solyc09g042410
3603832	Solyc09g042440
3603841	Solyc09g042460
3603846	Solyc09g042470
3603875	Solyc09g042540
3603880	Solyc09g042550
3603893	Solyc09g042580
3603939	Solyc09g042680
3604032	Solyc09g047880
3604037	Solyc09g047890
3604062	Solyc09g048950
3604067	Solyc09g048960
3604090	Solyc09g050000
3604094	Solyc09g050010
3604164	Solyc09g055160
3604169	Solyc09g055170
3604179	Solyc09g055190
3604223	Solyc09g055290
3604264	Solyc09g055370
3604268	Solyc09g055380
3604281	Solyc09g055410
3604291	Solyc09g055430
3604296	Solyc09g055440
3604335	Solyc09g055530
3604361	Solyc09g055580
3604372	Solyc09g055600
3604386	Solyc09g055630
3604390	Solyc09g055640
3604408	Solyc09g055680
3604430	Solyc09g055720
3604451	Solyc09g055770
3604552	Solyc09g055970
3604557	Solyc09g055980
3604575	Solyc09g056020
3604622	Solyc09g056120
3604632	Solyc09g056140
3604636	Solyc09g056150
3604684	Solyc09g056240
3604786	Solyc09g056460
3604791	Solyc09g056490
3604796	Solyc09g056500
3604835	Solyc09g057570
3604858	Solyc09g057620
3604904	Solyc09g057700
3604916	Solyc09g057720
3604921	Solyc09g057730
3604941	Solyc09g057770
3604999	Solyc09g057890
3605063	Solyc09g059000
3605127	Solyc09g059160
3605153	Solyc09g059230
3605217	Solyc09g059350
3605222	Solyc09g059360
3605279	Solyc09g059490
3605305	Solyc09g059530
3605335	Solyc09g059590
3605386	Solyc09g059680
3605425	Solyc09g059760
3605440	Solyc09g059790
3605500	Solyc09g059930
3605505	Solyc09g059940
3605556	Solyc09g060040
3605560	Solyc09g060050
3605633	Solyc09g060190
3605643	Solyc09g060220
3605648	Solyc09g061220
3605744	Solyc09g061400
3605861	Solyc09g061640
3605866	Solyc09g061650
3605871	Solyc09g061660
3605875	Solyc09g061670
3605886	Solyc09g061690
3605905	Solyc09g061720
3606094	Solyc09g063110
3606124	Solyc09g064150
3606139	Solyc09g064180
3606144	Solyc09g064190
3606194	Solyc09g064290
3606397	Solyc09g064650
3606421	Solyc09g064710
3606616	Solyc09g065060
3606705	Solyc09g065220
3607142	Solyc09g065960
3607146	Solyc09g065970
3607151	Solyc09g065980
3607173	Solyc09g066020
3607254	Solyc09g066170
3607259	Solyc09g066180
3607289	Solyc09g066240
3607448	Solyc09g072520
3607572	Solyc09g072730
3608000	Solyc09g074480
3608451	Solyc09g075240
3608456	Solyc09g075250
3610038	Solyc09g089900
3610746	Solyc09g091110
3612112	Solyc09g098430
3614245	Solyc10g008370
3614251	Solyc10g008380
3614577	Solyc10g008940
3614829	Solyc10g009370
3615185	Solyc10g012010
3615189	Solyc10g012020
3615294	Solyc10g012220
3615312	Solyc10g012260
3615415	Solyc10g012460
3615419	Solyc10g012470
3615424	Solyc10g012480
3615554	Solyc10g017730
3615563	Solyc10g017760
3615568	Solyc10g017770
3615582	Solyc10g017800
3615596	Solyc10g017840
3615769	Solyc10g018210
3615774	Solyc10g018220
3615779	Solyc10g018230
3615783	Solyc10g018240
3615836	Solyc10g018360
3615840	Solyc10g018370
3615854	Solyc10g018400
3615858	Solyc10g018410
3615863	Solyc10g018420
3615868	Solyc10g018430
3615873	Solyc10g018440
3615973	Solyc10g018680
3615991	Solyc10g018720
3615996	Solyc10g018730
3616027	Solyc10g018800
3616094	Solyc10g018960
3616142	Solyc10g019080
3616191	Solyc10g019180
3616220	Solyc10g019240
3616224	Solyc10g019250
3616301	Solyc10g024400
3616325	Solyc10g024450
3616357	Solyc10g025510
3616362	Solyc10g025520
3616402	Solyc10g035570
3616406	Solyc10g036580
3616410	Solyc10g036590
3616415	Solyc10g036600
3616419	Solyc10g036610
3616428	Solyc10g036630
3616458	Solyc10g036700
3616482	Solyc10g036750
3616486	Solyc10g036760
3616494	Solyc10g036800
3616515	Solyc10g036850
3616576	Solyc10g037970
3616595	Solyc10g038010
3616615	Solyc10g038050
3616625	Solyc10g038070
3616668	Solyc10g038160
3616692	Solyc10g039200
3616741	Solyc10g039300
3616746	Solyc10g039310
3616751	Solyc10g039320
3616756	Solyc10g039330
3616789	Solyc10g039400
3616794	Solyc10g039410
3616823	Solyc10g044460
3616842	Solyc10g044500
3616878	Solyc10g044600
3616883	Solyc10g044610
3616950	Solyc10g044770
3616960	Solyc10g044790
3616968	Solyc10g044810
3616987	Solyc10g044850
3616995	Solyc10g044870
3617023	Solyc10g044930
3617055	Solyc10g045000
3617086	Solyc10g045070
3617109	Solyc10g045120
3617114	Solyc10g045130
3617140	Solyc10g045200
3617183	Solyc10g045300
3617197	Solyc10g045340
3617207	Solyc10g045360
3617255	Solyc10g045470
3617339	Solyc10g045660
3617352	Solyc10g045700
3617357	Solyc10g045710
3617396	Solyc10g046780
3617444	Solyc10g046890
3617449	Solyc10g046900
3617454	Solyc10g046910
3617468	Solyc10g046940
3617473	Solyc10g046950
3617478	Solyc10g046960
3617502	Solyc10g047010
3617507	Solyc10g047020
3617608	Solyc10g047250
3617621	Solyc10g047280
3617689	Solyc10g047430
3617778	Solyc10g047620
3617813	Solyc10g047690
3617823	Solyc10g047710
3617840	Solyc10g047750
3617858	Solyc10g047790
3617875	Solyc10g047840
3617880	Solyc10g047850
3618071	Solyc10g049290
3618081	Solyc10g049310
3618085	Solyc10g049320
3618125	Solyc10g049400
3618152	Solyc10g049460
3618162	Solyc10g049480
3618167	Solyc10g049490
3618252	Solyc10g049670
3618257	Solyc10g049680
3618262	Solyc10g049690
3618281	Solyc10g049730
3618375	Solyc10g049950
3618380	Solyc10g049960
3618398	Solyc10g050000
3618431	Solyc10g050070
3618454	Solyc10g050120
3618459	Solyc10g050130
3618519	Solyc10g050260
3618524	Solyc10g050270
3618528	Solyc10g050280
3618533	Solyc10g050290
3618552	Solyc10g050330
3618557	Solyc10g050340
3618565	Solyc10g050360
3618574	Solyc10g050380
3618578	Solyc10g050390
3618587	Solyc10g050410
3618633	Solyc10g050520
3618638	Solyc10g050530
3618699	Solyc10g050660
3618709	Solyc10g050680
3618768	Solyc10g050800
3618773	Solyc10g050820
3618778	Solyc10g050830
3618866	Solyc10g051040
3618894	Solyc10g051100
3618980	Solyc10g051290
3618995	Solyc10g051320
3619034	Solyc10g051410
3619038	Solyc10g052410
3619043	Solyc10g052420
3619048	Solyc10g052430
3619052	Solyc10g052440
3619061	Solyc10g052460
3619126	Solyc10g052610
3619131	Solyc10g052630
3619159	Solyc10g052690
3619181	Solyc10g052760
3619256	Solyc10g053920
3619261	Solyc10g053930
3619266	Solyc10g053940
3619271	Solyc10g053950
3619304	Solyc10g054020
3619363	Solyc10g054140
3619367	Solyc10g054150
3619371	Solyc10g054160
3619381	Solyc10g054180
3619385	Solyc10g054190
3619394	Solyc10g054210
3619399	Solyc10g054220
3619403	Solyc10g054230
3619412	Solyc10g054250
3619417	Solyc10g054260
3619499	Solyc10g054430
3619564	Solyc10g054580
3619587	Solyc10g054630
3619592	Solyc10g054640
3619607	Solyc10g054680
3619611	Solyc10g054690
3619616	Solyc10g054700
3619629	Solyc10g054740
3619634	Solyc10g054750
3619671	Solyc10g054830
3619923	Solyc10g055380
3619966	Solyc10g055490
3619970	Solyc10g055500
3619975	Solyc10g055510
3620048	Solyc10g055660
3620061	Solyc10g055690
3620130	Solyc10g061820
3620144	Solyc10g061850
3620281	Solyc10g062140
3620296	Solyc10g062170
3620390	Solyc10g074350
3620420	Solyc10g074410
3620424	Solyc10g074420
3620454	Solyc10g074480
3620541	Solyc10g074660
3620546	Solyc10g074670
3620590	Solyc10g074760
3620627	Solyc10g074840
3620861	Solyc10g076310
3621164	Solyc10g076950
3621169	Solyc10g076960
3621174	Solyc10g076970
3621179	Solyc10g076980
3621255	Solyc10g077140
3621329	Solyc10g078290
3622061	Solyc10g079800
3622534	Solyc10g080790
3622539	Solyc10g080800
3622822	Solyc10g081400
3625337	Solyc11g005850
3625776	Solyc11g006790
3626324	Solyc11g007950
3626427	Solyc11g008160
3627219	Solyc11g010830
3627409	Solyc11g011230
3627562	Solyc11g011550
3627744	Solyc11g011950
3628067	Solyc11g012630
3628267	Solyc11g013040
3628272	Solyc11g013050
3628511	Solyc11g013540
3628761	Solyc11g017090
3628770	Solyc11g017110
3628792	Solyc11g017160
3628802	Solyc11g017180
3628839	Solyc11g017260
3629095	Solyc11g018780
3629186	Solyc11g019980
3629200	Solyc11g020010
3629205	Solyc11g020020
3629247	Solyc11g020120
3629307	Solyc11g020250
3629452	Solyc11g020560
3629457	Solyc11g020570
3629495	Solyc11g020650
3629507	Solyc11g020680
3629515	Solyc11g020700
3629557	Solyc11g020790
3629594	Solyc11g020880
3629623	Solyc11g020940
3629641	Solyc11g020980
3629658	Solyc11g021030
3629792	Solyc11g021320
3629802	Solyc11g021340
3629806	Solyc11g021350
3629878	Solyc11g022510
3629893	Solyc11g022550
3629897	Solyc11g022560
3629928	Solyc11g027650
3629943	Solyc11g027680
3629951	Solyc11g027700
3629978	Solyc11g027780
3629982	Solyc11g027790
3630034	Solyc11g027900
3630058	Solyc11g027950
3630067	Solyc11g027970
3630161	Solyc11g028190
3630174	Solyc11g028220
3630178	Solyc11g028250
3630193	Solyc11g028280
3630197	Solyc11g028290
3630246	Solyc11g030410
3630251	Solyc11g030420
3630255	Solyc11g030430
3630260	Solyc11g030440
3630264	Solyc11g030450
3630269	Solyc11g030460
3630278	Solyc11g030490
3630283	Solyc11g030500
3630291	Solyc11g030520
3630295	Solyc11g030530
3630338	Solyc11g030630
3630351	Solyc11g030660
3630355	Solyc11g030670
3630360	Solyc11g030680
3630364	Solyc11g030690
3630387	Solyc11g030740
3630507	Solyc11g031990
3630511	Solyc11g032000
3630525	Solyc11g032030
3630550	Solyc11g032080
3630584	Solyc11g032150
3630693	Solyc11g039440
3630697	Solyc11g039450
3630702	Solyc11g039460
3630706	Solyc11g039470
3630718	Solyc11g039500
3630723	Solyc11g039510
3630728	Solyc11g039520
3630764	Solyc11g039610
3630799	Solyc11g039700
3630830	Solyc11g039770
3630904	Solyc11g039940
3630955	Solyc11g040070
3631011	Solyc11g040190
3631020	Solyc11g040230
3631057	Solyc11g040310
3631071	Solyc11g040350
3631075	Solyc11g040360
3631137	Solyc11g042480
3631142	Solyc11g042490
3631151	Solyc11g042510
3631160	Solyc11g042530
3631181	Solyc11g042590
3631215	Solyc11g042690
3631219	Solyc11g042700
3631254	Solyc11g042780
3631274	Solyc11g042830
[truncated: 248 more rows]

## Sheet: SUPTABLE4
Table S4 Statistical results of the analysis of transposable elements consensus by the method of Makarevitch and al.
	17 to 52 d.p.a.	17 to 39 d.p.a.	39 to 42 d.p.a.	42 to 52 d.p.a.
Slyco_lightB_RS_1351		P value = 6,201e-6
		x-squared = 23,9815
Slyco-lightB_RS_879		P value = 9,54e-5
		x-squared = 18,5148
DXX-MITE_Slyco_light-B-G145-Map9		P value = 9,137e-4
		x-squared = 13,996
Slyco_lightB_RS_9049		P value = 2,039e-5
		x-squared = 21,6006
Slyco_lightB_RS_771	P value = 6,914e-4	P value = 4,774e-5
	x-squared = 14,5537	x-squared = 19,8996
Slyco_lightB_RS_485	P value = 1,472e-4
	x-squared = 17,6471
Slyco_lightB_RS_544	P value = 1,33e-4			P value = 1,892e-5
	x-squared = 17,8499			x-squared = 21,7505
SSR_Slyco_light-B-G630-Map5	P value = 4,511e-4		P value = 7,599e-5	P value = 2,163e-5
	x-squared = 15,4075		x-squared = 23,5751	x-squared = 21,4825
Slyco_lightB_RS_330	P value = 8,5e-5
	x-squared = 18,7457
noCat_Slyco_light-B-P241.225-Map9	P value = 1,083e-5
	x-squared = 22,8658
SSR_Slyco_light-B-R2046-Map17	P value = 1,004e-5		P value = 2,411e-4	P value = 1,635e-4
	x-squared = 23,0172		x-squared = 16,6603	x-squared = 17,4378
Slyco_lightB_RS_469			P value = 2,545e-5	P value = 1,545e-8
			x-squared = 21,1579	x-squared = 35,9711
Slyco_lightB_RS_457			P value = 7,372e-5	P value = 5,637e-4
			x-squared = 23,6357	x-squared = 14,962
Slyco_lightB_RS_181				P value = 3,664e-4
				x-squared = 15,8238
SSR_Slyco_light-B-R2504-Map8				P value = 9,11e-5
				x-squared = 23,2123

## Sheet: SUPTABLE5
Table S5 Functional annotation of differentially expressed genes candidate as RIN targets
Gene name	Functional annotation
Solyc01g005290.2.1	Solyc01g005290.2.1 ITAG_interpro polypeptide_region 2 68 . + . Name=IPR011074;Note=Phosphatidylinositol transfer protein-like%2C N-terminal
Solyc01g081610.2.1	Solyc01g081610.2.1 ITAG_interpro polypeptide_region 165 570 . + . Name=IPR013781;Note=Glycoside hydrolase%2C subgroup%2C catalytic core
Solyc01g108400.2.1	Solyc01g108400.2.1 ITAG_interpro polypeptide_region 185 580 . + . Name=IPR020636;Note=Calcium/calmodulin-dependent protein kinase-like
Solyc03g078360.1.1	Solyc03g078360.1.1 ITAG_blastp_refseq_pep match 1 786 692 + . query_length=792;subject_id=XP_002275786.1;Name=PREDICTED:;Note=hypothetical protein [Vitis vinifera];subject_length=796;subject_start=6;subject_end=785;e-value= 0.0;identities=376/796 (47%25);gaps=26/796 (3%25);positives=513/796 (64%25);length_coverage=786/792 (99.24%25)
	Solyc03g078360.1.1 ITAG_blastp_refseq_pep match 1 786 680 + . query_length=792;subject_id=XP_002276127.1;Name=PREDICTED:;Note=hypothetical protein [Vitis vinifera];subject_length=791;subject_start=1;subject_end=780;e-value= 0.0;identities=381/804 (47%25);gaps=42/804 (5%25);positives=522/804 (64%25);length_coverage=786/792 (99.24%25)
	Solyc03g078360.1.1 ITAG_blastp_refseq_pep match 1 786 617 + . query_length=792;subject_id=XP_002276297.1;Name=PREDICTED:;Note=hypothetical protein [Vitis vinifera];subject_length=713;subject_start=1;subject_end=702;e-value= e-174;identities=350/799 (43%25);gaps=110/799 (13%25);positives=481/799 (60%25);length_coverage=786/792 (99.24%25)
	Solyc03g078360.1.1 ITAG_blastp_trembl match 4 787 699 + . query_length=792;subject_id=B9N9R9;Name=B9N9R9_POPTR;Note=Predicted protein OS-Populus trichocarpa GN-POPTRDRAFT_1118445 PE-4 SV-1;subject_length=776;subject_start=1;subject_end=764;e-value= 0.0;identities=379/796 (47%25);gaps=44/796 (5%25);positives=513/796 (64%25);length_coverage=784/792 (98.99%25)
	Solyc03g078360.1.1 ITAG_blastp_refseq_pep match 4 787 699 + . query_length=792;subject_id=XP_002332037.1;Name=predicted;Note=protein [Populus trichocarpa];subject_length=776;subject_start=1;subject_end=764;e-value= 0.0;identities=379/796 (47%25);gaps=44/796 (5%25);positives=513/796 (64%25);length_coverage=784/792 (98.99%25)
	Solyc03g078360.1.1 ITAG_blastp_trembl match 6 786 597 + . query_length=792;subject_id=B9T444;Name=B9T444_RICCO;Note=Putative uncharacterized protein OS-Ricinus communis GN-RCOM_1170350 PE-4 SV-1;subject_length=1031;subject_start=22;subject_end=748;e-value= e-168;identities=339/792 (42%25);gaps=76/792 (9%25);positives=474/792 (59%25);length_coverage=781/792 (98.61%25)
	Solyc03g078360.1.1 ITAG_blastp_ath_pep match 6 787 255 + . query_length=792;subject_id=AT1G11280.3;Name=S-locus;Note=protein kinase%2C putative | chr1:3787456-3790621 REVERSE;subject_length=808;subject_start=16;subject_end=773;e-value= 7e-68;identities=233/831 (28%25);gaps=122/831 (14%25);positives=372/831 (44%25);length_coverage=782/792 (98.74%25)
	Solyc03g078360.1.1 ITAG_blastp_ath_pep match 6 787 255 + . query_length=792;subject_id=AT1G11280.4;Name=S-locus;Note=protein kinase%2C putative | chr1:3787456-3790728 REVERSE;subject_length=818;subject_start=26;subject_end=783;e-value= 8e-68;identities=233/831 (28%25);gaps=122/831 (14%25);positives=372/831 (44%25);length_coverage=782/792 (98.74%25)
	Solyc03g078360.1.1 ITAG_blastp_ath_pep match 6 787 251 + . query_length=792;subject_id=AT1G11280.1;Name=S-locus;Note=protein kinase%2C putative | chr1:3787456-3790728 REVERSE;subject_length=830;subject_start=26;subject_end=795;e-value= 2e-66;identities=233/843 (27%25);gaps=134/843 (15%25);positives=372/843 (44%25);length_coverage=782/792 (98.74%25)
	Solyc03g078360.1.1 ITAG_blastp_rice_pep match 6 786 418 + . query_length=792;subject_id=Os04t0475200-00;Name=Similar;Note=to OSIGBa0106G07.3 protein.;subject_length=801;subject_start=5;subject_end=787;e-value= e-117;identities=298/824 (36%25);gaps=84/824 (10%25);positives=443/824 (53%25);length_coverage=781/792 (98.61%25)
	Solyc03g078360.1.1 ITAG_blastp_trembl match 7 784 562 + . query_length=792;subject_id=B9T590;Name=B9T590_RICCO;Note=Serine-threonine protein kinase%2C plant-type%2C putative OS-Ricinus communis GN-RCOM_0069280 PE-4 SV-1;subject_length=787;subject_start=4;subject_end=774;e-value= e-158;identities=324/800 (40%25);gaps=51/800 (6%25);positives=474/800 (59%25);length_coverage=778/792 (98.23%25)
	Solyc03g078360.1.1 ITAG_blastp_trembl match 8 788 615 + . query_length=792;subject_id=B9T0N2;Name=B9T0N2_RICCO;Note=ATP binding protein%2C putative OS-Ricinus communis GN-RCOM_0576180 PE-4 SV-1;subject_length=783;subject_start=9;subject_end=772;e-value= e-174;identities=343/792 (43%25);gaps=39/792 (4%25);positives=482/792 (60%25);length_coverage=781/792 (98.61%25)
	Solyc03g078360.1.1 ITAG_blastp_rice_pep match 9 786 470 + . query_length=792;subject_id=Os08t0236400-00;Name=Hypothetical;Note=conserved gene.;subject_length=790;subject_start=8;subject_end=776;e-value= e-132;identities=293/807 (36%25);gaps=67/807 (8%25);positives=456/807 (56%25);length_coverage=778/792 (98.23%25)
	Solyc03g078360.1.1 ITAG_blastp_rice_pep match 9 787 440 + . query_length=792;subject_id=Os04t0201900-00;Name=Similar;Note=to H0512B01.10 protein.;subject_length=876;subject_start=66;subject_end=863;e-value= e-123;identities=301/822 (36%25);gaps=67/822 (8%25);positives=447/822 (54%25);length_coverage=779/792 (98.36%25)
	Solyc03g078360.1.1 ITAG_blastp_trembl match 15 787 602 + . query_length=792;subject_id=B9T0N0;Name=B9T0N0_RICCO;Note=ATP binding protein%2C putative OS-Ricinus communis GN-RCOM_0576160 PE-4 SV-1;subject_length=817;subject_start=18;subject_end=771;e-value= e-170;identities=335/787 (42%25);gaps=47/787 (5%25);positives=472/787 (59%25);length_coverage=773/792 (97.60%25)
	Solyc03g078360.1.1 ITAG_blastp_rice_pep match 17 786 480 + . query_length=792;subject_id=Os03t0828800-01;Name=Serine/threonine;Note=protein kinase-related domain containing protein.;subject_length=797;subject_start=20;subject_end=783;e-value= e-135;identities=298/806 (36%25);gaps=78/806 (9%25);positives=441/806 (54%25);length_coverage=770/792 (97.22%25)
	Solyc03g078360.1.1 ITAG_blastp_trembl match 22 787 720 + . query_length=792;subject_id=B9N9U9;Name=B9N9U9_POPTR;Note=Predicted protein OS-Populus trichocarpa GN-POPTRDRAFT_586812 PE-4 SV-1;subject_length=781;subject_start=17;subject_end=769;e-value= 0.0;identities=383/781 (49%25);gaps=43/781 (5%25);positives=515/781 (65%25);length_coverage=766/792 (96.72%25)
	Solyc03g078360.1.1 ITAG_blastp_trembl match 22 786 653 + . query_length=792;subject_id=A5BI98;Name=A5BI98_VITVI;Note=Putative uncharacterized protein OS-Vitis vinifera GN-VITISV_038238 PE-4 SV-1;subject_length=930;subject_start=172;subject_end=919;e-value= 0.0;identities=370/783 (47%25);gaps=53/783 (6%25);positives=505/783 (64%25);length_coverage=765/792 (96.59%25)
	Solyc03g078360.1.1 ITAG_blastp_refseq_pep match 22 787 720 + . query_length=792;subject_id=XP_002332033.1;Name=predicted;Note=protein [Populus trichocarpa];subject_length=781;subject_start=17;subject_end=769;e-value= 0.0;identities=383/781 (49%25);gaps=43/781 (5%25);positives=515/781 (65%25);length_coverage=766/792 (96.72%25)
	Solyc03g078360.1.1 ITAG_blastp_refseq_pep match 23 788 753 + . query_length=792;subject_id=XP_002275811.1;Name=PREDICTED:;Note=hypothetical protein [Vitis vinifera];subject_length=810;subject_start=34;subject_end=803;e-value= 0.0;identities=391/780 (50%25);gaps=24/780 (3%25);positives=528/780 (67%25);length_coverage=766/792 (96.72%25)
	Solyc03g078360.1.1 ITAG_blastp_rice_pep match 24 787 423 + . query_length=792;subject_id=Os04t0202300-00;Name=Serine/threonine;Note=protein kinase-related domain containing protein.;subject_length=811;subject_start=20;subject_end=798;e-value= e-118;identities=287/806 (35%25);gaps=69/806 (8%25);positives=423/806 (52%25);length_coverage=764/792 (96.46%25)
	Solyc03g078360.1.1 ITAG_blastp_rice_pep match 24 787 409 + . query_length=792;subject_id=Os04t0202500-00;Name=Similar;Note=to H0512B01.11 protein.;subject_length=786;subject_start=20;subject_end=773;e-value= e-114;identities=278/805 (34%25);gaps=92/805 (11%25);positives=412/805 (51%25);length_coverage=764/792 (96.46%25)
	Solyc03g078360.1.1 ITAG_blastp_rice_pep match 24 786 379 + . query_length=792;subject_id=Os04t0475100-00;Name=Similar;Note=to OSIGBa0106G07.2 protein.;subject_length=794;subject_start=18;subject_end=780;e-value= e-105;identities=280/808 (34%25);gaps=90/808 (11%25);positives=407/808 (50%25);length_coverage=763/792 (96.34%25)
	Solyc03g078360.1.1 ITAG_blastp_trembl match 27 787 739 + . query_length=792;subject_id=A5BY61;Name=A5BY61_VITVI;Note=Putative uncharacterized protein OS-Vitis vinifera GN-VITISV_038481 PE-4 SV-1;subject_length=762;subject_start=9;subject_end=752;e-value= 0.0;identities=387/774 (50%25);gaps=43/774 (5%25);positives=522/774 (67%25);length_coverage=761/792 (96.09%25)
	Solyc03g078360.1.1 ITAG_blastp_trembl match 27 753 632 + . query_length=792;subject_id=B9HEI7;Name=B9HEI7_POPTR;Note=Predicted protein OS-Populus trichocarpa GN-POPTRDRAFT_763983 PE-4 SV-1;subject_length=730;subject_start=25;subject_end=730;e-value= e-179;identities=348/734 (47%25);gaps=35/734 (4%25);positives=467/734 (63%25);length_coverage=727/792 (91.79%25)
	Solyc03g078360.1.1 ITAG_blastp_refseq_pep match 27 787 741 + . query_length=792;subject_id=XP_002276322.1;Name=PREDICTED:;Note=hypothetical protein [Vitis vinifera];subject_length=762;subject_start=9;subject_end=752;e-value= 0.0;identities=388/774 (50%25);gaps=43/774 (5%25);positives=521/774 (67%25);length_coverage=761/792 (96.09%25)
	Solyc03g078360.1.1 ITAG_blastp_refseq_pep match 27 787 741 + . query_length=792;subject_id=XP_002276274.1;Name=PREDICTED:;Note=hypothetical protein [Vitis vinifera];subject_length=762;subject_start=9;subject_end=752;e-value= 0.0;identities=388/774 (50%25);gaps=43/774 (5%25);positives=522/774 (67%25);length_coverage=761/792 (96.09%25)
	Solyc03g078360.1.1 ITAG_blastp_refseq_pep match 27 753 632 + . query_length=792;subject_id=XP_002309888.1;Name=predicted;Note=protein [Populus trichocarpa];subject_length=730;subject_start=25;subject_end=730;e-value= e-179;identities=348/734 (47%25);gaps=35/734 (4%25);positives=467/734 (63%25);length_coverage=727/792 (91.79%25)
	Solyc03g078360.1.1 ITAG_blastp_rice_pep match 27 787 432 + . query_length=792;subject_id=Os04t0202800-00;Name=Similar;Note=to H0512B01.12 protein.;subject_length=813;subject_start=31;subject_end=800;e-value= e-121;identities=288/794 (36%25);gaps=57/794 (7%25);positives=428/794 (53%25);length_coverage=761/792 (96.09%25)
	Solyc03g078360.1.1 ITAG_interpro polypeptide_region 28 144 10.676 . . Name=PS50927;length=117;Note=BULB_LECTIN;Dbxref=PROFILE:PS50927;database=PROFILE
	Solyc03g078360.1.1 ITAG_blastp_ath_pep match 29 786 324 + . query_length=792;subject_id=AT1G34300.1;Name=lectin;Note=protein kinase family protein | chr1:12503450-12505939 FORWARD;subject_length=829;subject_start=25;subject_end=762;e-value= 1e-88;identities=253/830 (30%25);gaps=164/830 (19%25);positives=394/830 (47%25);length_coverage=758/792 (95.71%25)
	Solyc03g078360.1.1 ITAG_blastp_rice_pep match 30 786 372 + . query_length=792;subject_id=Os06t0619600-00;Name=Hypothetical;Note=conserved gene.;subject_length=831;subject_start=33;subject_end=802;e-value= e-103;identities=264/810 (32%25);gaps=93/810 (11%25);positives=392/810 (48%25);length_coverage=757/792 (95.58%25)
	Solyc03g078360.1.1 ITAG_blastp_trembl match 31 786 632 + . query_length=792;subject_id=B9HEI6;Name=B9HEI6_POPTR;Note=Predicted protein (Fragment) OS-Populus trichocarpa GN-POPTRDRAFT_868081 PE-4 SV-1;subject_length=755;subject_start=4;subject_end=744;e-value= e-179;identities=350/769 (45%25);gaps=41/769 (5%25);positives=470/769 (61%25);length_coverage=756/792 (95.45%25)
	Solyc03g078360.1.1 ITAG_blastp_refseq_pep match 31 786 632 + . query_length=792;subject_id=XP_002309887.1;Name=predicted;Note=protein [Populus trichocarpa];subject_length=755;subject_start=4;subject_end=744;e-value= e-179;identities=350/769 (45%25);gaps=41/769 (5%25);positives=470/769 (61%25);length_coverage=756/792 (95.45%25)
	Solyc03g078360.1.1 ITAG_blastp_ath_pep match 34 786 297 + . query_length=792;subject_id=AT5G35370.1;Name=ATP;Note=binding / carbohydrate binding / kinase/ protein kinase/ protein serine/threonine kinase/ protein tyrosine kinase/ sugar binding | chr5:13588564-13591182 REVERSE;subject_length=872;subject_start=47;subject_end=809;e-value= 2e-80;identities=241/815 (29%25);gaps=114/815 (13%25);positive…
	Solyc03g078360.1.1 ITAG_interpro polypeptide_region 37 145 1.5e-12 . . Name=SM00108;length=109;Note=no description;Dbxref=SMART:SM00108;database=SMART
	Solyc03g078360.1.1 ITAG_blastp_ath_pep match 38 786 270 + . query_length=792;subject_id=AT4G32300.1;Name=SD2-5;Note=| SD2-5 (S-DOMAIN-2 5) carbohydrate binding / kinase/ protein kinase | chr4:15599970-15602435 FORWARD;subject_length=821;subject_start=40;subject_end=770;e-value= 4e-72;identities=228/784 (29%25);gaps=88/784 (11%25);positives=366/784 (46%25);length_coverage=749/792 (94.57%25)
	Solyc03g078360.1.1 ITAG_blastp_swissprot match 48 780 288 + . query_length=792;subject_id=P17801;Name=KPRO_MAIZE;Note=Putative receptor protein kinase ZmPK1 OS-Zea mays GN-PK1 PE-2 SV-2;subject_length=817;subject_start=50;subject_end=812;e-value= 8e-77;identities=246/793 (31%25);gaps=90/793 (11%25);positives=368/793 (46%25);length_coverage=733/792 (92.55%25)
	Solyc03g078360.1.1 ITAG_blastp_ath_pep match 48 788 303 + . query_length=792;subject_id=AT2G19130.1;Name=S-locus;Note=lectin protein kinase family protein | chr2:8293789-8296275 FORWARD;subject_length=828;subject_start=40;subject_end=777;e-value= 2e-82;identities=245/780 (31%25);gaps=81/780 (10%25);positives=369/780 (47%25);length_coverage=741/792 (93.56%25)
	Solyc03g078360.1.1 ITAG_blastp_ath_pep match 48 787 253 + . query_length=792;subject_id=AT4G11900.1;Name=S-locus;Note=lectin protein kinase family protein | chr4:7150241-7153542 REVERSE;subject_length=849;subject_start=44;subject_end=817;e-value= 4e-67;identities=244/816 (29%25);gaps=118/816 (14%25);positives=366/816 (44%25);length_coverage=740/792 (93.43%25)
	Solyc03g078360.1.1 ITAG_blastp_rice_pep match 48 786 325 + . query_length=792;subject_id=Os01t0890200-00;Name=Hypothetical;Note=conserved gene.;subject_length=790;subject_start=44;subject_end=770;e-value= 9e-89;identities=251/781 (32%25);gaps=96/781 (12%25);positives=389/781 (49%25);length_coverage=739/792 (93.31%25)
	Solyc03g078360.1.1 ITAG_blastp_ath_pep match 51 782 295 + . query_length=792;subject_id=AT4G00340.1;Name=RLK4;Note=| RLK4 (RECEPTOR-LIKE PROTEIN KINASE 4) protein kinase/ sugar binding | chr4:148958-151496 FORWARD;subject_length=818;subject_start=38;subject_end=761;e-value= 6e-80;identities=240/781 (30%25);gaps=106/781 (13%25);positives=369/781 (47%25);length_coverage=732/792 (92.42%25)
	Solyc03g078360.1.1 ITAG_interpro polypeptide_region 66 196 8.4e-22 . . Name=SSF51110;length=131;Note=alpha-D-mannose-specific plant lectins;Dbxref=SUPERFAMILY:SSF51110;database=SUPERFAMILY
	Solyc03g078360.1.1 ITAG_interpro polypeptide_region 72 176 3.1e-18 . . Name=PF01453;length=105;Note=B_lectin;Dbxref=PFAM:PF01453;database=PFAM
	Solyc03g078360.1.1 ITAG_interpro polypeptide_region 281 786 4.2e-125 . . Name=PTHR23258;length=506;Note=SERINE-THREONINE PROTEIN KINASE PLANT-TYPE;Dbxref=PANTHER:PTHR23258;database=PANTHER
	Solyc03g078360.1.1 ITAG_interpro polypeptide_region 281 786 4.2e-125 . . Name=PTHR23258:SF450;length=506;Note=RECEPTOR PROTEIN KINASE ZMPK1;Dbxref=PANTHER:PTHR23258:SF450;database=PANTHER
	Solyc03g078360.1.1 ITAG_blastp_swissprot match 418 786 199 + . query_length=792;subject_id=C0LGH3;Name=Y5614_ARATH;Note=Probable LRR receptor-like serine/threonine-protein kinase At1g56140 OS-Arabidopsis thaliana GN-At1g56140 PE-1 SV-2;subject_length=1033;subject_start=610;subject_end=967;e-value= 9e-50;identities=124/379 (32%25);gaps=31/379 (8%25);positives=197/379 (51%25);length_coverage=369/79…
	Solyc03g078360.1.1 ITAG_blastp_swissprot match 428 785 200 + . query_length=792;subject_id=C0LGU5;Name=Y5457_ARATH;Note=Probable LRR receptor-like serine/threonine-protein kinase At5g45780 OS-Arabidopsis thaliana GN-At5g45780 PE-2 SV-1;subject_length=614;subject_start=214;subject_end=577;e-value= 3e-50;identities=125/371 (33%25);gaps=20/371 (5%25);positives=206/371 (55%25);length_coverage=358/792…
	Solyc03g078360.1.1 ITAG_blastp_swissprot match 433 785 217 + . query_length=792;subject_id=Q9FID6;Name=Y5392_ARATH;Note=Probable receptor-like protein kinase At5g39020 OS-Arabidopsis thaliana GN-At5g39020 PE-2 SV-1;subject_length=813;subject_start=420;subject_end=772;e-value= 3e-55;identities=129/359 (35%25);gaps=12/359 (3%25);positives=210/359 (58%25);length_coverage=353/792 (44.57%25)
	Solyc03g078360.1.1 ITAG_blastp_swissprot match 435 782 202 + . query_length=792;subject_id=O23081;Name=CRK41_ARATH;Note=Cysteine-rich receptor-like protein kinase 41 OS-Arabidopsis thaliana GN-CRK41 PE-2 SV-2;subject_length=665;subject_start=272;subject_end=620;e-value= 6e-51;identities=130/366 (35%25);gaps=35/366 (9%25);positives=201/366 (54%25);length_coverage=348/792 (43.94%25)
	Solyc03g078360.1.1 ITAG_blastp_swissprot match 437 786 203 + . query_length=792;subject_id=C0LGH2;Name=Y1561_ARATH;Note=Probable LRR receptor-like serine/threonine-protein kinase At1g56130 OS-Arabidopsis thaliana GN-At1g56130 PE-1 SV-2;subject_length=1032;subject_start=628;subject_end=968;e-value= 4e-51;identities=126/361 (34%25);gaps=31/361 (8%25);positives=197/361 (54%25);length_coverage=350/79…
	Solyc03g078360.1.1 ITAG_blastp_swissprot match 450 780 202 + . query_length=792;subject_id=Q8H199;Name=CRK14_ARATH;Note=Cysteine-rich receptor-like protein kinase 14 OS-Arabidopsis thaliana GN-CRK14 PE-2 SV-2;subject_length=658;subject_start=278;subject_end=608;e-value= 1e-50;identities=116/342 (33%25);gaps=22/342 (6%25);positives=188/342 (54%25);length_coverage=331/792 (41.79%25)
	Solyc03g078360.1.1 ITAG_blastp_swissprot match 453 782 200 + . query_length=792;subject_id=Q0WVM4;Name=Y2239_ARATH;Note=Probable LRR receptor-like serine/threonine-protein kinase At2g23950 OS-Arabidopsis thaliana GN-At2g23950 PE-2 SV-1;subject_length=634;subject_start=234;subject_end=570;e-value= 4e-50;identities=126/345 (36%25);gaps=23/345 (6%25);positives=193/345 (55%25);length_coverage=330/792…
	Solyc03g078360.1.1 ITAG_interpro polypeptide_region 485 780 . + . Name=IPR011009;Note=Protein kinase-like
	Solyc03g078360.1.1 ITAG_interpro polypeptide_region 485 780 4e-69 . . Name=SSF56112;length=296;Note=Protein kinase-like (PK-like);Dbxref=SUPERFAMILY:SSF56112;database=SUPERFAMILY
	Solyc03g078360.1.1 ITAG_interpro polypeptide_region 496 589 3.6e-17 . . Name=G3DSA:3.30.200.20;length=94;Note=no description;Dbxref=GENE3D:G3DSA:3.30.200.20;database=GENE3D
	Solyc03g078360.1.1 ITAG_blastp_swissprot match 502 786 202 + . query_length=792;subject_id=C0LGG8;Name=Y5343_ARATH;Note=Probable LRR receptor-like serine/threonine-protein kinase At1g53430 OS-Arabidopsis thaliana GN-At1g53430 PE-1 SV-1;subject_length=1038;subject_start=656;subject_end=946;e-value= 1e-50;identities=112/293 (38%25);gaps=10/293 (3%25);positives=171/293 (58%25);length_coverage=285/79…
	Solyc03g078360.1.1 ITAG_blastp_swissprot match 502 786 201 + . query_length=792;subject_id=C0LGG9;Name=Y5344_ARATH;Note=Probable LRR receptor-like serine/threonine-protein kinase At1g53440 OS-Arabidopsis thaliana GN-At1g53440 PE-1 SV-2;subject_length=1035;subject_start=654;subject_end=944;e-value= 1e-50;identities=112/293 (38%25);gaps=10/293 (3%25);positives=171/293 (58%25);length_coverage=285/79…
	Solyc03g078360.1.1 ITAG_blastp_ath_pep match 503 786 276 + . query_length=792;subject_id=AT5G60900.1;Name=RLK1;Note=| RLK1 (RECEPTOR-LIKE PROTEIN KINASE 1) ATP binding / carbohydrate binding / kinase/ protein kinase/ protein serine/threonine kinase/ protein tyrosine kinase/ sugar binding | chr5:24498467-24501494 REVERSE;subject_length=748;subject_start=437;subject_end=721;e-value= 4e-74;identitie…
	Solyc03g078360.1.1 ITAG_interpro polypeptide_region 513 789 32.372 . . Name=PS50011;length=277;Note=PROTEIN_KINASE_DOM;Dbxref=PROFILE:PS50011;database=PROFILE
	Solyc03g078360.1.1 ITAG_interpro polypeptide_region 515 780 2.7e-14 . . Name=SM00219;length=266;Note=no description;Dbxref=SMART:SM00219;database=SMART
	Solyc03g078360.1.1 ITAG_interpro polypeptide_region 515 789 5.2e-19 . . Name=SM00220;length=275;Note=no description;Dbxref=SMART:SM00220;database=SMART
	Solyc03g078360.1.1 ITAG_interpro polypeptide_region 522 708 7.5e-30 . . Name=PF00069;length=187;Note=Pkinase;Dbxref=PFAM:PF00069;database=PFAM
	Solyc03g078360.1.1 ITAG_interpro polypeptide_region 592 791 2.4e-45 . . Name=G3DSA:1.10.510.10;length=200;Note=no description;Dbxref=GENE3D:G3DSA:1.10.510.10;database=GENE3D
Solyc04g005020.2.1	Solyc04g005020.2.1 ITAG_interpro polypeptide_region 263 277 . + . Name=IPR020472;Note=G-protein beta WD-40 repeat%2C region	ITAG_interpro	polypeptide_region	263	277	.	+	.	Name=IPR020472;Note=G-protein beta WD-40 repeat%2C region
Solyc06g059740.2.1	Solyc06g059740.2.1 ITAG_interpro polypeptide_region 7 233 . + . Name=IPR002085;Note=Alcohol dehydrogenase superfamily%2C zinc-containing
Solyc06g068460.2.1	Solyc06g068460.2.1 ITAG_gene3d polypeptide_region 152 230 . + . Name=G3DSA:2.20.25.80;Note=no description
Solyc06g068900.2.1	Solyc06g068900.2.1 ITAG_interpro polypeptide_region 26 165 . + . Name=IPR000086;Note=NUDIX hydrolase domain
Solyc07g047800.2.1	Solyc07g047800.2.1 ITAG_interpro polypeptide_region 5 253 . + . Name=IPR002198;Note=Short-chain dehydrogenase/reductase SDR
Solyc08g066690.2.1	Solyc08g066690.2.1 ITAG_interpro polypeptide_region 310 588 . + . Name=IPR004263;Note=Exostosin-like
Solyc09g089580.2.1	Solyc09g089580.2.1 ITAG_hmmpanther polypeptide_region 70 363 . + . Name=PTHR10209;Note=PTHR10209
Solyc10g006880.2.1	Solyc10g006880.2.1 ITAG_interpro polypeptide_region 12 180 . + . Name=IPR003441;Note=No apical meristem (NAM) protein
Solyc10g085880.1.1	Solyc10g085880.1.1 ITAG_blastp_trembl match 1 336 397 + . query_length=344;subject_id=D7LJ75;Name=D7LJ75_ARALY;Note=UDP-glucoronosyl/UDP-glucosyl transferase family protein OS-Arabidopsis lyrata subsp. lyrata GN-ARALYDRAFT_902799 PE-4 SV-1;subject_length=496;subject_start=153;subject_end=490;e-value= e-108;identities=190/339 (56%25);gaps=4/339 (1%25);positives=252/339 (74%25);length_coverage=336/…
	Solyc10g085880.1.1 ITAG_blastp_trembl match 1 340 389 + . query_length=344;subject_id=Q9ZQ96;Name=Q9ZQ96_ARATH;Note=Putative glucosyl transferase OS-Arabidopsis thaliana GN-At2g36780 PE-2 SV-1;subject_length=496;subject_start=153;subject_end=494;e-value= e-106;identities=186/344 (54%25);gaps=6/344 (1%25);positives=260/344 (75%25);length_coverage=340/344 (98.84%25)
	Solyc10g085880.1.1 ITAG_blastp_trembl match 1 337 386 + . query_length=344;subject_id=C6KI43;Name=C6KI43_CITSI;Note=UDP-glucosyltransferase family 1 protein OS-Citrus sinensis GN-UGT2 PE-3 SV-1;subject_length=504;subject_start=161;subject_end=498;e-value= e-105;identities=187/339 (55%25);gaps=3/339 (0%25);positives=255/339 (75%25);length_coverage=337/344 (97.97%25)
	Solyc10g085880.1.1 ITAG_blastp_trembl match 1 339 382 + . query_length=344;subject_id=D7LJ76;Name=D7LJ76_ARALY;Note=Don-glucosyltransferase OS-Arabidopsis lyrata subsp. lyrata GN-DOGT1 PE-4 SV-1;subject_length=496;subject_start=152;subject_end=493;e-value= e-104;identities=180/342 (52%25);gaps=3/342 (0%25);positives=252/342 (73%25);length_coverage=339/344 (98.55%25)
	Solyc10g085880.1.1 ITAG_blastp_refseq_pep match 1 336 397 + . query_length=344;subject_id=XP_002881468.1;Name=UDP-glucoronosyl/UDP-glucosyl;Note=transferase family protein [Arabidopsis lyrata subsp. lyrata];subject_length=496;subject_start=153;subject_end=490;e-value= e-108;identities=190/339 (56%25);gaps=4/339 (1%25);positives=252/339 (74%25);length_coverage=336/344 (97.67%25)
	Solyc10g085880.1.1 ITAG_blastp_refseq_pep match 1 338 395 + . query_length=344;subject_id=XP_002265216.1;Name=PREDICTED:;Note=hypothetical protein [Vitis vinifera];subject_length=494;subject_start=149;subject_end=487;e-value= e-108;identities=193/340 (56%25);gaps=3/340 (0%25);positives=254/340 (74%25);length_coverage=338/344 (98.26%25)
	Solyc10g085880.1.1 ITAG_blastp_refseq_pep match 1 340 389 + . query_length=344;subject_id=NP_181216.1;Name=UDP-glucoronosyl/UDP-glucosyl;Note=transferase family protein [Arabidopsis thaliana];subject_length=496;subject_start=153;subject_end=494;e-value= e-106;identities=186/344 (54%25);gaps=6/344 (1%25);positives=260/344 (75%25);length_coverage=340/344 (98.84%25)	ITAG_interpro	polypeptide_region	263	277	.	+	.	Name=IPR020472;Note=G-protein beta WD-40 repeat%2C region
	Solyc10g085880.1.1 ITAG_blastp_refseq_pep match 1 339 382 + . query_length=344;subject_id=XP_002881469.1;Name=don-glucosyltransferase;Note=[Arabidopsis lyrata subsp. lyrata];subject_length=496;subject_start=152;subject_end=493;e-value= e-104;identities=180/342 (52%25);gaps=3/342 (0%25);positives=252/342 (73%25);length_coverage=339/344 (98.55%25)
	Solyc10g085880.1.1 ITAG_blastp_refseq_pep match 1 338 381 + . query_length=344;subject_id=NP_181218.1;Name=DOGT1;Note=(DON-GLUCOSYLTRANSFERASE 1) UDP-glycosyltransferase/ cis-zeatin O-beta-D-glucosyltransferase/ glucosyltransferase/ quercetin 4'-O-glucosyltransferase/ quercetin 7-O-glucosyltransferase/ trans-zeatin O-beta-D-glucosyltransferase/ transferase%2C transferring glycosyl groups [Arabido…
	Solyc10g085880.1.1 ITAG_blastp_refseq_pep match 1 339 379 + . query_length=344;subject_id=XP_002881467.1;Name=UDP-glucosyl;Note=transferase 72C1 [Arabidopsis lyrata subsp. lyrata];subject_length=491;subject_start=149;subject_end=488;e-value= e-103;identities=179/342 (52%25);gaps=5/342 (1%25);positives=252/342 (73%25);length_coverage=339/344 (98.55%25)
	Solyc10g085880.1.1 ITAG_blastp_refseq_pep match 1 338 377 + . query_length=344;subject_id=XP_002265409.1;Name=PREDICTED:;Note=hypothetical protein [Vitis vinifera];subject_length=495;subject_start=148;subject_end=486;e-value= e-103;identities=183/340 (53%25);gaps=3/340 (0%25);positives=244/340 (71%25);length_coverage=338/344 (98.26%25)
	Solyc10g085880.1.1 ITAG_blastp_swissprot match 1 338 381 + . query_length=344;subject_id=Q9ZQ94;Name=COGT3_ARATH;Note=Cytokinin-O-glucosyltransferase 3 OS-Arabidopsis thaliana GN-UGT73C5 PE-2 SV-1;subject_length=495;subject_start=151;subject_end=491;e-value= e-105;identities=180/341 (52%25);gaps=3/341 (0%25);positives=251/341 (73%25);length_coverage=338/344 (98.26%25)
	Solyc10g085880.1.1 ITAG_blastp_swissprot match 1 336 374 + . query_length=344;subject_id=Q9ZQ99;Name=COGT1_ARATH;Note=Cytokinin-O-glucosyltransferase 1 OS-Arabidopsis thaliana GN-UGT73C1 PE-2 SV-1;subject_length=491;subject_start=149;subject_end=485;e-value= e-103;identities=177/339 (52%25);gaps=5/339 (1%25);positives=247/339 (72%25);length_coverage=336/344 (97.67%25)
	Solyc10g085880.1.1 ITAG_blastp_swissprot match 1 339 355 + . query_length=344;subject_id=Q9ZQ95;Name=FOGT1_ARATH;Note=Flavonol-3-O-glycoside-7-O-glucosyltransferase 1 OS-Arabidopsis thaliana GN-UGT73C6 PE-2 SV-1;subject_length=495;subject_start=152;subject_end=492;e-value= 3e-97;identities=180/343 (52%25);gaps=6/343 (1%25);positives=252/343 (73%25);length_coverage=339/344 (98.55%25)
	Solyc10g085880.1.1 ITAG_blastp_ath_pep match 1 340 389 + . query_length=344;subject_id=AT2G36780.1;Name=UDP-glucoronosyl/UDP-glucosyl;Note=transferase family protein | chr2:15417618-15419108 REVERSE;subject_length=496;subject_start=153;subject_end=494;e-value= e-108;identities=186/344 (54%25);gaps=6/344 (1%25);positives=260/344 (75%25);length_coverage=340/344 (98.84%25)
	Solyc10g085880.1.1 ITAG_blastp_ath_pep match 1 338 381 + . query_length=344;subject_id=AT2G36800.1;Name=DOGT1%2C;Note=UGT73C5 | DOGT1 (DON-GLUCOSYLTRANSFERASE 1) UDP-glycosyltransferase/ cis-zeatin O-beta-D-glucosyltransferase/ glucosyltransferase/ quercetin 4'-O-glucosyltransferase/ quercetin 7-O-glucosyltransferase/ trans-zeatin O-beta-D-glucosyltransferase/ transferase%2C transf | chr2:1542349…
	Solyc10g085880.1.1 ITAG_blastp_ath_pep match 1 336 374 + . query_length=344;subject_id=AT2G36750.1;Name=UGT73C1;Note=| UGT73C1 (UDP-GLUCOSYL TRANSFERASE 73C1) UDP-glucosyltransferase/ UDP-glycosyltransferase/ cis-zeatin O-beta-D-glucosyltransferase/ trans-zeatin O-beta-D-glucosyltransferase/ transferase%2C transferring glycosyl groups | chr2:15410531-15412006 REVERSE;subject_length=491;subject_st…
	Solyc10g085880.1.1 ITAG_blastp_ath_pep match 1 338 366 + . query_length=344;subject_id=AT2G36760.1;Name=UGT73C2;Note=| UGT73C2 (UDP-glucosyl transferase 73C2) UDP-glycosyltransferase/ transferase%2C transferring glycosyl groups / transferase%2C transferring hexosyl groups | chr2:15413042-15414532 REVERSE;subject_length=496;subject_start=153;subject_end=492;e-value= e-101;identities=172/341 (50%25…
	Solyc10g085880.1.1 ITAG_blastp_ath_pep match 1 339 355 + . query_length=344;subject_id=AT2G36790.1;Name=UGT73C6;Note=| UGT73C6 (UDP-glucosyl transferase 73C6) UDP-glucosyltransferase/ UDP-glycosyltransferase/ quercetin 3-O-glucosyltransferase/ quercetin 4'-O-glucosyltransferase/ quercetin 7-O-glucosyltransferase/ transferase%2C transferring glycosyl groups | chr2:15420339-15421826 REVERSE;subject…
	Solyc10g085880.1.1 ITAG_blastp_ath_pep match 1 341 326 + . query_length=344;subject_id=AT3G53150.1;Name=UGT73D1;Note=| UGT73D1 (UDP-glucosyl transferase 73D1) UDP-glycosyltransferase/ transferase%2C transferring hexosyl groups | chr3:19697736-19699259 REVERSE;subject_length=507;subject_start=153;subject_end=507;e-value= 1e-89;identities=171/357 (47%25);gaps=18/357 (5%25);positives=234/357 (65%25)…
	Solyc10g085880.1.1 ITAG_blastp_rice_pep match 1 332 229 + . query_length=344;subject_id=Os03t0358800-00;Name=Hypothetical;Note=conserved gene.;subject_length=505;subject_start=148;subject_end=480;e-value= 2e-60;identities=139/335 (41%25);gaps=5/335 (1%25);positives=196/335 (58%25);length_coverage=332/344 (96.51%25)
	Solyc10g085880.1.1 ITAG_blastp_trembl match 2 339 388 + . query_length=344;subject_id=Q9ZQ97;Name=Q9ZQ97_ARATH;Note=At2g36770/F13K3.17 OS-Arabidopsis thaliana GN-At2g36770 PE-2 SV-1;subject_length=496;subject_start=154;subject_end=493;e-value= e-106;identities=181/341 (53%25);gaps=4/341 (1%25);positives=253/341 (74%25);length_coverage=338/344 (98.26%25)
	Solyc10g085880.1.1 ITAG_blastp_refseq_pep match 2 339 388 + . query_length=344;subject_id=NP_181215.1;Name=UDP-glucoronosyl/UDP-glucosyl;Note=transferase family protein [Arabidopsis thaliana];subject_length=496;subject_start=154;subject_end=493;e-value= e-106;identities=181/341 (53%25);gaps=4/341 (1%25);positives=253/341 (74%25);length_coverage=338/344 (98.26%25)
	Solyc10g085880.1.1 ITAG_blastp_ath_pep match 2 339 388 + . query_length=344;subject_id=AT2G36770.1;Name=UDP-glucoronosyl/UDP-glucosyl;Note=transferase family protein | chr2:15415227-15416717 REVERSE;subject_length=496;subject_start=154;subject_end=493;e-value= e-108;identities=181/341 (53%25);gaps=4/341 (1%25);positives=253/341 (74%25);length_coverage=338/344 (98.26%25)
	Solyc10g085880.1.1 ITAG_blastp_rice_pep match 2 343 234 + . query_length=344;subject_id=Os03t0212000-00;Name=Hypothetical;Note=conserved gene.;subject_length=494;subject_start=148;subject_end=488;e-value= 5e-62;identities=138/352 (39%25);gaps=21/352 (5%25);positives=190/352 (53%25);length_coverage=342/344 (99.42%25)
	Solyc10g085880.1.1 ITAG_blastp_trembl match 3 337 420 + . query_length=344;subject_id=B1Q468;Name=B1Q468_ANTMA;Note=Flavonoid glucoyltransferase UGT73E2 OS-Antirrhinum majus GN-AmUGT36 PE-2 SV-1;subject_length=501;subject_start=150;subject_end=484;e-value= e-115;identities=203/335 (60%25);gaps=0;positives=258/335 (77%25);length_coverage=335/344 (97.38%25)
	Solyc10g085880.1.1 ITAG_blastp_trembl match 3 335 390 + . query_length=344;subject_id=B2NID5;Name=B2NID5_PERFR;Note=UGT73A7 OS-Perilla frutescens GN-PfUGT2 PE-2 SV-1;subject_length=513;subject_start=151;subject_end=486;e-value= e-107;identities=190/336 (56%25);gaps=3/336 (0%25);positives=252/336 (75%25);length_coverage=333/344 (96.80%25)
	Solyc10g085880.1.1 ITAG_blastp_trembl match 3 338 389 + . query_length=344;subject_id=B9S0A0;Name=B9S0A0_RICCO;Note=UDP-glucosyltransferase%2C putative OS-Ricinus communis GN-RCOM_1351950 PE-3 SV-1;subject_length=483;subject_start=150;subject_end=479;e-value= e-106;identities=193/338 (57%25);gaps=10/338 (2%25);positives=255/338 (75%25);length_coverage=336/344 (97.67%25)
	Solyc10g085880.1.1 ITAG_blastp_trembl match 3 337 385 + . query_length=344;subject_id=Q589Y3;Name=Q589Y3_TOBAC;Note=Glucosyltransferase OS-Nicotiana tabacum GN-NtGT4 PE-2 SV-1;subject_length=496;subject_start=150;subject_end=490;e-value= e-105;identities=184/341 (53%25);gaps=6/341 (1%25);positives=251/341 (73%25);length_coverage=335/344 (97.38%25)
	Solyc10g085880.1.1 ITAG_blastp_trembl match 3 343 384 + . query_length=344;subject_id=B9T117;Name=B9T117_RICCO;Note=UDP-glucosyltransferase%2C putative OS-Ricinus communis GN-RCOM_0458380 PE-3 SV-1;subject_length=492;subject_start=151;subject_end=491;e-value= e-105;identities=191/344 (55%25);gaps=6/344 (1%25);positives=257/344 (74%25);length_coverage=341/344 (99.13%25)
	Solyc10g085880.1.1 ITAG_blastp_refseq_pep match 3 338 389 + . query_length=344;subject_id=XP_002519419.1;Name=UDP-glucosyltransferase%2C;Note=putative [Ricinus communis];subject_length=483;subject_start=150;subject_end=479;e-value= e-106;identities=193/338 (57%25);gaps=10/338 (2%25);positives=255/338 (75%25);length_coverage=336/344 (97.67%25)
	Solyc10g085880.1.1 ITAG_blastp_refseq_pep match 3 343 384 + . query_length=344;subject_id=XP_002531930.1;Name=UDP-glucosyltransferase%2C;Note=putative [Ricinus communis];subject_length=492;subject_start=151;subject_end=491;e-value= e-105;identities=191/344 (55%25);gaps=6/344 (1%25);positives=257/344 (74%25);length_coverage=341/344 (99.13%25)
	Solyc10g085880.1.1 ITAG_blastp_ath_pep match 3 339 357 + . query_length=344;subject_id=AT3G53160.1;Name=UGT73C7;Note=| UGT73C7 (UDP-glucosyl transferase 73C7) UDP-glycosyltransferase/ transferase%2C transferring glycosyl groups | chr3:19702485-19703957 REVERSE;subject_length=490;subject_start=150;subject_end=487;e-value= 8e-99;identities=166/339 (48%25);gaps=3/339 (0%25);positives=248/339 (73%25)…
	Solyc10g085880.1.1 ITAG_blastp_rice_pep match 3 337 262 + . query_length=344;subject_id=Os02t0207400-00;Name=Similar;Note=to UDP-glycosyltransferase UGT99C4.;subject_length=534;subject_start=186;subject_end=516;e-value= 3e-70;identities=145/340 (42%25);gaps=14/340 (4%25);positives=204/340 (60%25);length_coverage=335/344 (97.38%25)
	Solyc10g085880.1.1 ITAG_blastp_rice_pep match 3 337 250 + . query_length=344;subject_id=Os02t0206700-01;Name=UDP-glucuronosyl/UDP-glucosyltransferase;Note=family protein.;subject_length=501;subject_start=163;subject_end=493;e-value= 9e-67;identities=146/341 (42%25);gaps=16/341 (4%25);positives=208/341 (60%25);length_coverage=335/344 (97.38%25)
	Solyc10g085880.1.1 ITAG_blastp_swissprot match 4 335 265 + . query_length=344;subject_id=Q8H0F2;Name=ANGT_GENTR;Note=Anthocyanin 3'-O-beta-glucosyltransferase OS-Gentiana triflora PE-1 SV-1;subject_length=482;subject_start=145;subject_end=477;e-value= 3e-70;identities=145/338 (42%25);gaps=11/338 (3%25);positives=222/338 (65%25);length_coverage=332/344 (96.51%25)
	Solyc10g085880.1.1 ITAG_blastp_swissprot match 4 334 162 + . query_length=344;subject_id=Q40288;Name=UFOG6_MANES;Note=Anthocyanidin 3-O-glucosyltransferase 6 (Fragment) OS-Manihot esculenta GN-GT6 PE-2 SV-1;subject_length=394;subject_start=69;subject_end=389;e-value= 4e-39;identities=109/343 (31%25);gaps=34/343 (9%25);positives=185/343 (53%25);length_coverage=331/344 (96.22%25)
	Solyc10g085880.1.1 ITAG_blastp_ath_pep match 4 334 264 + . query_length=344;subject_id=AT2G15490.1;Name=UGT73B4;Note=| UGT73B4 (UDP-GLYCOSYLTRANSFERASE 73B4) UDP-glucosyltransferase/ UDP-glycosyltransferase/ quercetin 3-O-glucosyltransferase/ quercetin 7-O-glucosyltransferase/ transferase%2C transferring glycosyl groups | chr2:6761750-6763398 FORWARD;subject_length=484;subject_start=155;subject_e…
	Solyc10g085880.1.1 ITAG_blastp_ath_pep match 4 334 261 + . query_length=344;subject_id=AT2G15480.1;Name=UGT73B5;Note=| UGT73B5 (UDP-glucosyl transferase 73B5) UDP-glucosyltransferase/ UDP-glycosyltransferase/ quercetin 3-O-glucosyltransferase/ transferase%2C transferring glycosyl groups | chr2:6758817-6760452 FORWARD;subject_length=484;subject_start=158;subject_end=480;e-value= 3e-70;identities=1…
	Solyc10g085880.1.1 ITAG_blastp_rice_pep match 4 336 271 + . query_length=344;subject_id=Os10t0178500-01;Name=UDP-glucuronosyl/UDP-glucosyltransferase;Note=family protein.;subject_length=528;subject_start=153;subject_end=485;e-value= 4e-73;identities=139/336 (41%25);gaps=6/336 (1%25);positives=198/336 (58%25);length_coverage=333/344 (96.80%25)
	Solyc10g085880.1.1 ITAG_blastp_rice_pep match 4 331 229 + . query_length=344;subject_id=Os04t0523600-01;Name=UDP-glucuronosyl/UDP-glucosyltransferase;Note=family protein.;subject_length=502;subject_start=164;subject_end=498;e-value= 1e-60;identities=133/339 (39%25);gaps=15/339 (4%25);positives=189/339 (55%25);length_coverage=328/344 (95.35%25)
	Solyc10g085880.1.1 ITAG_interpro polypeptide_region 16 261 3.4e-89 . . Name=PTHR11926;length=246;Note=GLUCOSYL/GLUCURONOSYL TRANSFERASES;Dbxref=PANTHER:PTHR11926;database=PANTHER
	Solyc10g085880.1.1 ITAG_interpro polypeptide_region 16 261 3.4e-89 . . Name=PTHR11926:SF15;length=246;Note=UDP-GLUCOSYLTRANSFERASE;Dbxref=PANTHER:PTHR11926:SF15;database=PANTHER
	Solyc10g085880.1.1 ITAG_blastp_rice_pep match 18 334 272 + . query_length=344;subject_id=Os01t0176100-00;Name=UDP-glucuronosyl/UDP-glucosyltransferase;Note=family protein.;subject_length=501;subject_start=180;subject_end=493;e-value= 2e-73;identities=144/321 (44%25);gaps=11/321 (3%25);positives=214/321 (66%25);length_coverage=317/344 (92.15%25)
	Solyc10g085880.1.1 ITAG_blastp_rice_pep match 23 334 281 + . query_length=344;subject_id=Os01t0176000-01;Name=UDP-glucuronosyl/UDP-glucosyltransferase;Note=family protein.;subject_length=498;subject_start=181;subject_end=490;e-value= 3e-76;identities=145/315 (46%25);gaps=8/315 (2%25);positives=212/315 (67%25);length_coverage=312/344 (90.70%25)
	Solyc10g085880.1.1 ITAG_blastp_rice_pep match 23 334 279 + . query_length=344;subject_id=Os01t0176200-01;Name=UDP-glucuronosyl/UDP-glucosyltransferase;Note=family protein.;subject_length=497;subject_start=180;subject_end=489;e-value= 1e-75;identities=144/315 (45%25);gaps=8/315 (2%25);positives=213/315 (67%25);length_coverage=312/344 (90.70%25)
	Solyc10g085880.1.1 ITAG_blastp_rice_pep match 23 334 279 + . query_length=344;subject_id=Os01t0176200-02;Name=UDP-glucuronosyl/UDP-glucosyltransferase;Note=family protein.;subject_length=497;subject_start=180;subject_end=489;e-value= 1e-75;identities=144/315 (45%25);gaps=8/315 (2%25);positives=213/315 (67%25);length_coverage=312/344 (90.70%25)
	Solyc10g085880.1.1 ITAG_blastp_swissprot match 41 330 170 + . query_length=344;subject_id=Q9AR73;Name=HQGT_RAUSE;Note=Hydroquinone glucosyltransferase OS-Rauvolfia serpentina GN-AS PE-1 SV-1;subject_length=470;subject_start=177;subject_end=459;e-value= 1e-41;identities=106/305 (34%25);gaps=37/305 (12%25);positives=160/305 (52%25);length_coverage=290/344 (84.30%25)
	Solyc10g085880.1.1 ITAG_blastp_swissprot match 71 335 172 + . query_length=344;subject_id=P56725;Name=ZOX_PHAVU;Note=Zeatin O-xylosyltransferase OS-Phaseolus vulgaris GN-ZOX1 PE-2 SV-1;subject_length=454;subject_start=197;subject_end=453;e-value= 3e-42;identities=101/273 (36%25);gaps=24/273 (8%25);positives=150/273 (54%25);length_coverage=265/344 (77.03%25)
	Solyc10g085880.1.1 ITAG_blastp_swissprot match 71 336 169 + . query_length=344;subject_id=Q9ZSK5;Name=ZOG_PHALU;Note=Zeatin O-glucosyltransferase OS-Phaseolus lunatus GN-ZOG1 PE-2 SV-1;subject_length=459;subject_start=202;subject_end=459;e-value= 2e-41;identities=98/276 (35%25);gaps=28/276 (10%25);positives=150/276 (54%25);length_coverage=266/344 (77.33%25)
	Solyc10g085880.1.1 ITAG_blastp_swissprot match 71 332 164 + . query_length=344;subject_id=Q4R1I9;Name=ANGLT_ROSHC;Note=Anthocyanidin 5%2C3-O-glucosyltransferase OS-Rosa hybrid cultivar GN-RhGT1 PE-2 SV-1;subject_length=473;subject_start=216;subject_end=468;e-value= 8e-40;identities=101/277 (36%25);gaps=39/277 (14%25);positives=148/277 (53%25);length_coverage=262/344 (76.16%25)
	Solyc10g085880.1.1 ITAG_interpro polypeptide_region 95 333 1.8e-28 . . Name=SSF53756;length=239;Note=UDP-Glycosyltransferase/glycogen phosphorylase;Dbxref=SUPERFAMILY:SSF53756;database=SUPERFAMILY
	Solyc10g085880.1.1 ITAG_blastp_swissprot match 105 338 244 + . query_length=344;subject_id=Q40286;Name=UFOG4_MANES;Note=Anthocyanidin 3-O-glucosyltransferase 4 (Fragment) OS-Manihot esculenta GN-GT4 PE-2 SV-1;subject_length=241;subject_start=1;subject_end=237;e-value= 8e-64;identities=131/237 (55%25);gaps=3/237 (1%25);positives=179/237 (75%25);length_coverage=234/344 (68.02%25)
	Solyc10g085880.1.1 ITAG_gene3d polypeptide_region 123 313 . + . Name=G3DSA:3.40.50.2000;Note=no description
	Solyc10g085880.1.1 ITAG_interpro polypeptide_region 123 313 4.4e-11 . . Name=G3DSA:3.40.50.2000;length=191;Note=no description;Dbxref=GENE3D:G3DSA:3.40.50.2000;database=GENE3D
	Solyc10g085880.1.1 ITAG_interpro polypeptide_region 202 248 5.8e-15 . . Name=PF00201;length=47;Note=UDPGT;Dbxref=PFAM:PF00201;database=PFAM
Solyc12g055930.1.1	Solyc12g055930.1.1 ITAG_blastp_trembl match 1 341 617 + . query_length=348;subject_id=Q6XZA0;Name=Q6XZA0_SOLTU;Note=UDP-glucose 4-epimerase OS-Solanum tuberosum GN-StUGE45 PE-2 SV-1;subject_length=362;subject_start=1;subject_end=341;e-value= e-175;identities=288/341 (84%25);gaps=0;positives=319/341 (93%25);length_coverage=341/348 (97.99%25)
	Solyc12g055930.1.1 ITAG_blastp_trembl match 1 341 607 + . query_length=348;subject_id=B9GL51;Name=B9GL51_POPTR;Note=Predicted protein OS-Populus trichocarpa GN-POPTRDRAFT_815032 PE-3 SV-1;subject_length=348;subject_start=1;subject_end=341;e-value= e-172;identities=282/341 (82%25);gaps=0;positives=315/341 (92%25);length_coverage=341/348 (97.99%25)
	Solyc12g055930.1.1 ITAG_blastp_trembl match 1 344 604 + . query_length=348;subject_id=D7TVG8;Name=D7TVG8_VITVI;Note=Whole genome shotgun sequence of line PN40024%2C scaffold_25.assembly12x (Fragment) OS-Vitis vinifera GN-VIT_00019545001 PE-4 SV-1;subject_length=348;subject_start=1;subject_end=344;e-value= e-171;identities=279/344 (81%25);gaps=0;positives=312/344 (90%25);length_coverage=344/348 (9…
	Solyc12g055930.1.1 ITAG_blastp_trembl match 1 341 604 + . query_length=348;subject_id=A9PG00;Name=A9PG00_POPTR;Note=Putative uncharacterized protein OS-Populus trichocarpa PE-2 SV-1;subject_length=348;subject_start=1;subject_end=341;e-value= e-171;identities=280/341 (82%25);gaps=0;positives=314/341 (92%25);length_coverage=341/348 (97.99%25)
	Solyc12g055930.1.1 ITAG_blastp_trembl match 1 344 603 + . query_length=348;subject_id=A5BGY1;Name=A5BGY1_VITVI;Note=Putative uncharacterized protein OS-Vitis vinifera GN-VITISV_009458 PE-3 SV-1;subject_length=348;subject_start=1;subject_end=344;e-value= e-171;identities=281/344 (81%25);gaps=0;positives=312/344 (90%25);length_coverage=344/348 (98.85%25)
	Solyc12g055930.1.1 ITAG_blastp_trembl match 1 347 598 + . query_length=348;subject_id=B9GXJ3;Name=B9GXJ3_POPTR;Note=Predicted protein OS-Populus trichocarpa GN-POPTRDRAFT_646762 PE-3 SV-1;subject_length=348;subject_start=1;subject_end=346;e-value= e-169;identities=284/347 (81%25);gaps=1/347 (0%25);positives=315/347 (90%25);length_coverage=347/348 (99.71%25)
	Solyc12g055930.1.1 ITAG_blastp_trembl match 1 346 591 + . query_length=348;subject_id=D7LYU6;Name=D7LYU6_ARALY;Note=UDP-D-glucose/UDP-D-galactose 4-epimerase 5 OS-Arabidopsis lyrata subsp. lyrata GN-UGE5 PE-4 SV-1;subject_length=351;subject_start=2;subject_end=347;e-value= e-167;identities=276/346 (79%25);gaps=0;positives=309/346 (89%25);length_coverage=346/348 (99.43%25)
	Solyc12g055930.1.1 ITAG_blastp_trembl match 1 338 583 + . query_length=348;subject_id=D7M8Z8;Name=D7M8Z8_ARALY;Note=UDP-D-glucose/UDP-D-galactose 4-epimerase 2 OS-Arabidopsis lyrata subsp. lyrata GN-UGE2 PE-4 SV-1;subject_length=350;subject_start=1;subject_end=338;e-value= e-165;identities=272/338 (80%25);gaps=0;positives=306/338 (90%25);length_coverage=338/348 (97.13%25)
	Solyc12g055930.1.1 ITAG_blastp_trembl match 1 338 580 + . query_length=348;subject_id=Q541V9;Name=Q541V9_ARATH;Note=Putative UDPglucose 4-epimerase OS-Arabidopsis thaliana GN-At4g23920/T32A16_90 PE-2 SV-1;subject_length=350;subject_start=1;subject_end=338;e-value= e-164;identities=270/338 (79%25);gaps=0;positives=305/338 (90%25);length_coverage=338/348 (97.13%25)
	Solyc12g055930.1.1 ITAG_blastp_refseq_pep match 1 341 607 + . query_length=348;subject_id=XP_002299469.1;Name=predicted;Note=protein [Populus trichocarpa];subject_length=348;subject_start=1;subject_end=341;e-value= e-172;identities=282/341 (82%25);gaps=0;positives=315/341 (92%25);length_coverage=341/348 (97.99%25)
	Solyc12g055930.1.1 ITAG_blastp_refseq_pep match 1 344 604 + . query_length=348;subject_id=XP_002268779.1;Name=PREDICTED:;Note=hypothetical protein [Vitis vinifera];subject_length=348;subject_start=1;subject_end=344;e-value= e-171;identities=279/344 (81%25);gaps=0;positives=312/344 (90%25);length_coverage=344/348 (98.85%25)
	Solyc12g055930.1.1 ITAG_blastp_refseq_pep match 1 344 603 + . query_length=348;subject_id=XP_002268294.1;Name=PREDICTED:;Note=hypothetical protein [Vitis vinifera];subject_length=348;subject_start=1;subject_end=344;e-value= e-171;identities=281/344 (81%25);gaps=0;positives=312/344 (90%25);length_coverage=344/348 (98.85%25)
	Solyc12g055930.1.1 ITAG_blastp_refseq_pep match 1 347 598 + . query_length=348;subject_id=XP_002303653.1;Name=predicted;Note=protein [Populus trichocarpa];subject_length=348;subject_start=1;subject_end=346;e-value= e-169;identities=284/347 (81%25);gaps=1/347 (0%25);positives=315/347 (90%25);length_coverage=347/348 (99.71%25)
	Solyc12g055930.1.1 ITAG_blastp_refseq_pep match 1 346 591 + . query_length=348;subject_id=XP_002874660.1;Name=UDP-D-glucose/UDP-D-galactose;Note=4-epimerase 5 [Arabidopsis lyrata subsp. lyrata];subject_length=351;subject_start=2;subject_end=347;e-value= e-167;identities=276/346 (79%25);gaps=0;positives=309/346 (89%25);length_coverage=346/348 (99.43%25)
	Solyc12g055930.1.1 ITAG_blastp_refseq_pep match 1 346 585 + . query_length=348;subject_id=NP_192834.1;Name=UGE5;Note=(UDP-D-glucose/UDP-D-galactose 4-epimerase 5) UDP-glucose 4-epimerase/ protein dimerization [Arabidopsis thaliana];subject_length=351;subject_start=2;subject_end=347;e-value= e-165;identities=272/346 (78%25);gaps=0;positives=308/346 (89%25);length_coverage=346/348 (99.43%25)
	Solyc12g055930.1.1 ITAG_blastp_refseq_pep match 1 338 583 + . query_length=348;subject_id=XP_002869754.1;Name=UDP-D-glucose/UDP-D-galactose;Note=4-epimerase 2 [Arabidopsis lyrata subsp. lyrata];subject_length=350;subject_start=1;subject_end=338;e-value= e-165;identities=272/338 (80%25);gaps=0;positives=306/338 (90%25);length_coverage=338/348 (97.13%25)
	Solyc12g055930.1.1 ITAG_blastp_refseq_pep match 1 338 580 + . query_length=348;subject_id=NP_194123.1;Name=UGE2;Note=(UDP-D-glucose/UDP-D-galactose 4-epimerase 2) UDP-glucose 4-epimerase/ protein dimerization [Arabidopsis thaliana];subject_length=350;subject_start=1;subject_end=338;e-value= e-164;identities=270/338 (79%25);gaps=0;positives=305/338 (90%25);length_coverage=338/348 (97.13%25)
	Solyc12g055930.1.1 ITAG_blastp_refseq_pep match 1 347 570 + . query_length=348;subject_id=XP_002887887.1;Name=hypothetical;Note=protein ARALYDRAFT_892971 [Arabidopsis lyrata subsp. lyrata];subject_length=348;subject_start=1;subject_end=347;e-value= e-160;identities=265/347 (76%25);gaps=0;positives=299/347 (86%25);length_coverage=347/348 (99.71%25)
	Solyc12g055930.1.1 ITAG_blastp_swissprot match 1 346 585 + . query_length=348;subject_id=Q9SN58;Name=GALE2_ARATH;Note=UDP-glucose 4-epimerase 2 OS-Arabidopsis thaliana GN-At4g10960 PE-2 SV-3;subject_length=351;subject_start=2;subject_end=347;e-value= e-166;identities=272/346 (78%25);gaps=0;positives=308/346 (89%25);length_coverage=346/348 (99.43%25)
	Solyc12g055930.1.1 ITAG_blastp_swissprot match 1 338 580 + . query_length=348;subject_id=Q9T0A7;Name=GALE3_ARATH;Note=UDP-glucose 4-epimerase 3 OS-Arabidopsis thaliana GN-At4g23920 PE-2 SV-1;subject_length=350;subject_start=1;subject_end=338;e-value= e-165;identities=270/338 (79%25);gaps=0;positives=305/338 (90%25);length_coverage=338/348 (97.13%25)
	Solyc12g055930.1.1 ITAG_blastp_swissprot match 1 342 483 + . query_length=348;subject_id=Q42605;Name=GALE1_ARATH;Note=UDP-glucose 4-epimerase 1 OS-Arabidopsis thaliana GN-At1g12780 PE-1 SV-2;subject_length=351;subject_start=5;subject_end=348;e-value= e-136;identities=224/344 (65%25);gaps=2/344 (0%25);positives=279/344 (81%25);length_coverage=342/348 (98.28%25)
	Solyc12g055930.1.1 ITAG_blastp_swissprot match 1 341 410 + . query_length=348;subject_id=Q5R8D0;Name=GALE_PONAB;Note=UDP-glucose 4-epimerase OS-Pongo abelii GN-GALE PE-2 SV-1;subject_length=348;subject_start=1;subject_end=344;e-value= e-114;identities=203/348 (58%25);gaps=11/348 (3%25);positives=248/348 (71%25);length_coverage=341/348 (97.99%25)
	Solyc12g055930.1.1 ITAG_blastp_swissprot match 1 341 409 + . query_length=348;subject_id=Q14376;Name=GALE_HUMAN;Note=UDP-glucose 4-epimerase OS-Homo sapiens GN-GALE PE-1 SV-2;subject_length=348;subject_start=1;subject_end=344;e-value= e-113;identities=203/348 (58%25);gaps=11/348 (3%25);positives=248/348 (71%25);length_coverage=341/348 (97.99%25)
	Solyc12g055930.1.1 ITAG_blastp_ath_pep match 1 346 585 + . query_length=348;subject_id=AT4G10960.1;Name=UGE5;Note=| UGE5 (UDP-D-glucose/UDP-D-galactose 4-epimerase 5) UDP-glucose 4-epimerase/ protein dimerization | chr4:6716083-6718472 REVERSE;subject_length=351;subject_start=2;subject_end=347;e-value= e-167;identities=272/346 (78%25);gaps=0;positives=308/346 (89%25);length_coverage=346/348 (99.4…
	Solyc12g055930.1.1 ITAG_blastp_ath_pep match 1 338 580 + . query_length=348;subject_id=AT4G23920.1;Name=UGE2;Note=| UGE2 (UDP-D-glucose/UDP-D-galactose 4-epimerase 2) UDP-glucose 4-epimerase/ protein dimerization | chr4:12431416-12433666 FORWARD;subject_length=350;subject_start=1;subject_end=338;e-value= e-166;identities=270/338 (79%25);gaps=0;positives=305/338 (90%25);length_coverage=338/348 (97…
	Solyc12g055930.1.1 ITAG_blastp_ath_pep match 1 347 563 + . query_length=348;subject_id=AT1G64440.1;Name=RHD1%2C;Note=REB1%2C UGE4 | RHD1 (ROOT HAIR DEFECTIVE 1) UDP-glucose 4-epimerase/ protein dimerization | chr1:23937102-23939565 FORWARD;subject_length=348;subject_start=1;subject_end=347;e-value= e-161;identities=263/347 (75%25);gaps=0;positives=296/347 (85%25);length_coverage=347/348 (99.71%25)
	Solyc12g055930.1.1 ITAG_blastp_ath_pep match 1 342 483 + . query_length=348;subject_id=AT1G12780.1;Name=UGE1;Note=| UGE1 (UDP-D-glucose/UDP-D-galactose 4-epimerase 1) UDP-glucose 4-epimerase/ protein dimerization | chr1:4356124-4358120 REVERSE;subject_length=351;subject_start=5;subject_end=348;e-value= e-137;identities=224/344 (65%25);gaps=2/344 (0%25);positives=279/344 (81%25);length_coverage=34…
	Solyc12g055930.1.1 ITAG_blastp_ath_pep match 1 342 475 + . query_length=348;subject_id=AT1G63180.1;Name=UGE3;Note=| UGE3 (UDP-D-glucose/UDP-D-galactose 4-epimerase 3) UDP-glucose 4-epimerase/ protein dimerization | chr1:23427559-23429384 REVERSE;subject_length=351;subject_start=5;subject_end=348;e-value= e-134;identities=221/344 (64%25);gaps=2/344 (0%25);positives=279/344 (81%25);length_coverage=…
	Solyc12g055930.1.1 ITAG_interpro polypeptide_region 1 216 2.1e-63 . . Name=G3DSA:3.40.50.720;length=216;Note=no description;Dbxref=GENE3D:G3DSA:3.40.50.720;database=GENE3D
	Solyc12g055930.1.1 ITAG_blastp_trembl match 2 347 584 + . query_length=348;subject_id=B7FIW1;Name=B7FIW1_MEDTR;Note=Putative uncharacterized protein OS-Medicago truncatula PE-2 SV-1;subject_length=392;subject_start=46;subject_end=390;e-value= e-165;identities=272/346 (78%25);gaps=1/346 (0%25);positives=308/346 (89%25);length_coverage=346/348 (99.43%25)
	Solyc12g055930.1.1 ITAG_blastp_swissprot match 2 347 595 + . query_length=348;subject_id=O65781;Name=GALE2_CYATE;Note=UDP-glucose 4-epimerase GEPI48 OS-Cyamopsis tetragonoloba PE-2 SV-1;subject_length=350;subject_start=3;subject_end=348;e-value= e-169;identities=275/346 (79%25);gaps=0;positives=311/346 (89%25);length_coverage=346/348 (99.43%25)
	Solyc12g055930.1.1 ITAG_blastp_swissprot match 2 343 480 + . query_length=348;subject_id=Q43070;Name=GALE1_PEA;Note=UDP-glucose 4-epimerase OS-Pisum sativum GN-GALE PE-2 SV-1;subject_length=350;subject_start=5;subject_end=348;e-value= e-135;identities=223/344 (64%25);gaps=2/344 (0%25);positives=275/344 (79%25);length_coverage=342/348 (98.28%25)
	Solyc12g055930.1.1 ITAG_blastp_rice_pep match 2 348 541 + . query_length=348;subject_id=Os09t0323000-01;Name=Similar;Note=to UDP-galactose 4-epimerase-like protein.;subject_length=369;subject_start=17;subject_end=363;e-value= e-154;identities=246/347 (70%25);gaps=0;positives=292/347 (84%25);length_coverage=347/348 (99.71%25)
	Solyc12g055930.1.1 ITAG_blastp_refseq_pep match 3 347 567 + . query_length=348;subject_id=XP_002467861.1;Name=hypothetical;Note=protein SORBIDRAFT_01g035380 [Sorghum bicolor];subject_length=355;subject_start=7;subject_end=353;e-value= e-160;identities=266/347 (76%25);gaps=2/347 (0%25);positives=306/347 (88%25);length_coverage=345/348 (99.14%25)
	Solyc12g055930.1.1 ITAG_blastp_swissprot match 3 343 472 + . query_length=348;subject_id=O65780;Name=GALE1_CYATE;Note=UDP-glucose 4-epimerase GEPI42 OS-Cyamopsis tetragonoloba PE-2 SV-1;subject_length=354;subject_start=10;subject_end=352;e-value= e-132;identities=220/343 (64%25);gaps=2/343 (0%25);positives=272/343 (79%25);length_coverage=341/348 (97.99%25)
	Solyc12g055930.1.1 ITAG_blastp_rice_pep match 3 347 537 + . query_length=348;subject_id=Os08t0374800-01;Name=Similar;Note=to UDP-galactose 4-epimerase-like protein.;subject_length=408;subject_start=12;subject_end=356;e-value= e-153;identities=248/346 (71%25);gaps=2/346 (0%25);positives=297/346 (85%25);length_coverage=345/348 (99.14%25)
	Solyc12g055930.1.1 ITAG_interpro polypeptide_region 3 342 4.4e-107 . . Name=SSF51735;length=340;Note=NAD(P)-binding Rossmann-fold domains;Dbxref=SUPERFAMILY:SSF51735;database=SUPERFAMILY
	Solyc12g055930.1.1 ITAG_interpro polypeptide_region 4 342 . + . Name=IPR005886;Note=UDP-glucose 4-epimerase
	Solyc12g055930.1.1 ITAG_blastp_ath_pep match 4 341 271 + . query_length=348;subject_id=AT1G30620.3;Name=HSR8%2C;Note=MUR4%2C UXE1 | MUR4 (MURUS 4) UDP-arabinose 4-epimerase/ catalytic | chr1:10855496-10857970 FORWARD;subject_length=418;subject_start=71;subject_end=408;e-value= 3e-73;identities=155/349 (44%25);gaps=22/349 (6%25);positives=203/349 (58%25);length_coverage=338/348 (97.13%25)
	Solyc12g055930.1.1 ITAG_blastp_ath_pep match 4 341 271 + . query_length=348;subject_id=AT1G30620.2;Name=HSR8%2C;Note=MUR4%2C UXE1 | MUR4 (MURUS 4) UDP-arabinose 4-epimerase/ catalytic | chr1:10855496-10857970 FORWARD;subject_length=419;subject_start=72;subject_end=409;e-value= 4e-73;identities=155/349 (44%25);gaps=22/349 (6%25);positives=203/349 (58%25);length_coverage=338/348 (97.13%25)
	Solyc12g055930.1.1 ITAG_blastp_ath_pep match 4 341 271 + . query_length=348;subject_id=AT1G30620.1;Name=HSR8%2C;Note=MUR4%2C UXE1 | MUR4 (MURUS 4) UDP-arabinose 4-epimerase/ catalytic | chr1:10855496-10857970 FORWARD;subject_length=419;subject_start=72;subject_end=409;e-value= 4e-73;identities=155/349 (44%25);gaps=22/349 (6%25);positives=203/349 (58%25);length_coverage=338/348 (97.13%25)
	Solyc12g055930.1.1 ITAG_blastp_ath_pep match 4 341 271 + . query_length=348;subject_id=AT5G44480.1;Name=DUR;Note=| DUR (DEFECTIVE UGE IN ROOT) UDP-glucose 4-epimerase/ binding / catalytic/ coenzyme binding | chr5:17921515-17923643 FORWARD;subject_length=436;subject_start=96;subject_end=433;e-value= 4e-73;identities=152/349 (43%25);gaps=22/349 (6%25);positives=207/349 (59%25);length_coverage=338/3…
	Solyc12g055930.1.1 ITAG_blastp_ath_pep match 4 344 263 + . query_length=348;subject_id=AT4G20460.1;Name=NAD-dependent;Note=epimerase/dehydratase family protein | chr4:11029767-11031572 REVERSE;subject_length=379;subject_start=39;subject_end=379;e-value= 1e-70;identities=151/347 (43%25);gaps=12/347 (3%25);positives=200/347 (57%25);length_coverage=341/348 (97.99%25)
	Solyc12g055930.1.1 ITAG_blastp_rice_pep match 4 347 457 + . query_length=348;subject_id=Os09t0526700-01;Name=Similar;Note=to UDP-glucose 4-epimerase (EC 5.1.3.2) (Galactowaldenase) (UDP-galactose 4-epimerase).;subject_length=373;subject_start=27;subject_end=372;e-value= e-129;identities=220/346 (63%25);gaps=2/346 (0%25);positives=265/346 (76%25);length_coverage=344/348 (98.85%25)
	Solyc12g055930.1.1 ITAG_blastp_rice_pep match 4 341 270 + . query_length=348;subject_id=Os08t0129700-02;Name=NAD(P)-binding;Note=domain containing protein.;subject_length=406;subject_start=65;subject_end=403;e-value= 1e-72;identities=151/349 (43%25);gaps=21/349 (6%25);positives=201/349 (57%25);length_coverage=338/348 (97.13%25)
	Solyc12g055930.1.1 ITAG_blastp_rice_pep match 4 341 270 + . query_length=348;subject_id=Os08t0129700-01;Name=NAD(P)-binding;Note=domain containing protein.;subject_length=406;subject_start=65;subject_end=403;e-value= 1e-72;identities=151/349 (43%25);gaps=21/349 (6%25);positives=201/349 (57%25);length_coverage=338/348 (97.13%25)
	Solyc12g055930.1.1 ITAG_blastp_rice_pep match 4 341 269 + . query_length=348;subject_id=Os04t0618200-02;Name=NAD(P)-binding;Note=domain containing protein.;subject_length=428;subject_start=88;subject_end=425;e-value= 2e-72;identities=152/344 (44%25);gaps=12/344 (3%25);positives=197/344 (57%25);length_coverage=338/348 (97.13%25)
	Solyc12g055930.1.1 ITAG_blastp_rice_pep match 4 341 269 + . query_length=348;subject_id=Os04t0618200-01;Name=NAD(P)-binding;Note=domain containing protein.;subject_length=428;subject_start=88;subject_end=425;e-value= 2e-72;identities=152/344 (44%25);gaps=12/344 (3%25);positives=197/344 (57%25);length_coverage=338/348 (97.13%25)
	Solyc12g055930.1.1 ITAG_blastp_rice_pep match 4 341 258 + . query_length=348;subject_id=Os07t0139400-02;Name=NAD(P)-binding;Note=domain containing protein.;subject_length=421;subject_start=74;subject_end=413;e-value= 3e-69;identities=151/350 (43%25);gaps=22/350 (6%25);positives=200/350 (57%25);length_coverage=338/348 (97.13%25)
	Solyc12g055930.1.1 ITAG_blastp_rice_pep match 4 341 258 + . query_length=348;subject_id=Os07t0139400-01;Name=NAD(P)-binding;Note=domain containing protein.;subject_length=421;subject_start=74;subject_end=413;e-value= 3e-69;identities=151/350 (43%25);gaps=22/350 (6%25);positives=200/350 (57%25);length_coverage=338/348 (97.13%25)
	Solyc12g055930.1.1 ITAG_interpro polypeptide_region 4 341 3e-182 . . Name=TIGR01179;length=338;Note=galE: UDP-glucose 4-epimerase;Dbxref=TIGRFAMs:TIGR01179;database=TIGRFAMs
	Solyc12g055930.1.1 ITAG_blastp_swissprot match 5 345 426 + . query_length=348;subject_id=P55180;Name=GALE_BACSU;Note=UDP-glucose 4-epimerase OS-Bacillus subtilis GN-galE PE-3 SV-1;subject_length=339;subject_start=3;subject_end=339;e-value= e-118;identities=206/341 (60%25);gaps=4/341 (1%25);positives=254/341 (74%25);length_coverage=341/348 (97.99%25)
	Solyc12g055930.1.1 ITAG_blastp_swissprot match 5 344 409 + . query_length=348;subject_id=Q553X7;Name=GALE_DICDI;Note=UDP-glucose 4-epimerase OS-Dictyostelium discoideum GN-galE PE-1 SV-1;subject_length=344;subject_start=8;subject_end=344;e-value= e-113;identities=194/340 (57%25);gaps=3/340 (0%25);positives=248/340 (72%25);length_coverage=340/348 (97.70%25)
	Solyc12g055930.1.1 ITAG_interpro polypeptide_region 5 267 9.8e-74 . . Name=PF01370;length=263;Note=Epimerase;Dbxref=PFAM:PF01370;database=PFAM
	Solyc12g055930.1.1 ITAG_interpro polypeptide_region 7 342 2.2e-191 . . Name=PTHR10366:SF39;length=336;Note=UDP-GLUCOSE 4-EPIMERASE;Dbxref=PANTHER:PTHR10366:SF39;database=PANTHER
	Solyc12g055930.1.1 ITAG_interpro polypeptide_region 7 342 2.2e-191 . . Name=PTHR10366;length=336;Note=NAD DEPENDENT EPIMERASE/DEHYDRATASE;Dbxref=PANTHER:PTHR10366;database=PANTHER
	Solyc12g055930.1.1 ITAG_blastp_rice_pep match 42 341 220 + . query_length=348;subject_id=Os07t0139400-03;Name=Similar;Note=to UDP-D-xylose epimerase 1.;subject_length=313;subject_start=4;subject_end=305;e-value= 1e-57;identities=132/312 (42%25);gaps=22/312 (7%25);positives=174/312 (55%25);length_coverage=300/348 (86.21%25)
